# Supplementary material for: Behavioral dissection of hunger states in Drosophila
Source: eLife. 2023 Jun 16;12:RP84537. doi: 10.7554/eLife.84537 (PMC10328523; doi:10.7554/eLife.84537)
Supplement: Figure 1—source data 1. [file elife-84537-fig1-data1.xls]

## Sheet: Fig1B_D
Treatment	BehaviorB	BehaviorCD	Value
Sated	F	F	0.428571
Sated	F	FH	0.142857
Sated	F	FHM	0.142857
Sated	LQ	LQHM	0.142857
Sated	O	RH	0.142857
Starved	F	F	0.333333
Starved	F	FHM	0.133333
Starved	I	HM	0.0666667
Starved	L	L	0.133333
Starved	O	G	0.0666667
Starved	O	RH	0.2
Starved	F	F	0.461538
Starved	F	FH	0.230769
Starved	L	L	0.0769231
Sated	F	F	0.125
Sated	F	FH	0.0416667
Sated	F	FHM	0.0833333
Sated	I	FF	0.0416667
Sated	I	H	0.25
Sated	I	HM	0.0416667
Sated	L	LHM	0.0416667
Sated	LQ	LQH	0.0416667
Sated	O	G	0.25
Sated	O	RH	0.0833333
Starved	I	H	0.0909091
Starved	O	G	0.181818
Starved	O	RH	0.545455
Sated	F	F	0.5
Sated	F	FH	0.2
Sated	I	FF	0.1
Sated	L	LH	0.1
Starved	F	FH	0.166667
Starved	I	FF	0.166667
Starved	L	LH	0.166667
Starved	O	G	0.166667
Starved	O	RH	0.333333
Sated	F	F	0.307692
Sated	F	FH	0.307692
Sated	L	LH	0.0769231
Starved	F	FHM	0.333333
Starved	I	FF	0.166667
Starved	I	HM	0.166667
Starved	L	LHM	0.166667
Sated	F	F	0.0909091
Sated	F	FH	0.454545
Sated	L	L	0.181818
Sated	L	LHM	0.181818
Sated	O	RH	0.0909091
Starved	F	FHM	0.1
Starved	I	H	0.1
Starved	L	LH	0.1
Starved	L	LHM	0.4
Starved	LQ	LQHM	0.1
Starved	O	G	0.1
Starved	O	RH	0.1
Starved	F	FH	0.0714286
Starved	I	FF	0.428571
Starved	L	LH	0.0714286
Starved	LQ	LQH	0.0714286
Starved	LQ	LQHM	0.142857
Starved	O	RH	0.0714286
Sated	F	F	0.3
Sated	F	FH	0.3
Sated	F	FHM	0.1
Sated	L	L	0.2
Sated	O	G	0.1
Starved	F	F	0.142857
Starved	F	FH	0.142857
Starved	F	FHM	0.142857
Starved	I	FF	0.142857
Starved	L	LH	0.285714
Starved	L	LHM	0.142857
Sated	F	F	0.375
Sated	F	FH	0.375
Sated	I	H	0.125
Sated	LQ	LQHM	0.125
Starved	F	FHM	0.0714286
Starved	I	H	0.0714286
Starved	L	LH	0.0714286
Starved	L	LHM	0.214286
Starved	O	G	0.0714286
Starved	O	RH	0.357143
Starved	F	FH	0.142857
Starved	F	FHM	0.142857
Starved	L	LH	0.428571
Starved	L	LHM	0.285714
Starved	F	F	0.142857
Starved	F	FH	0.142857
Starved	I	FF	0.142857
Starved	L	LH	0.428571
Starved	LQ	LQH	0.142857
Sated	F	FH	0.285714
Sated	LQ	LQH	0.142857
Sated	LQ	LQHM	0.142857
Sated	O	G	0.428571
Starved	F	F	0.125
Starved	F	FH	0.25
Starved	I	FF	0.25
Starved	L	LH	0.25
Starved	LQ	LQHM	0.125
Starved	F	FH	0.166667
Starved	I	FF	0.333333
Starved	L	L	0.166667
Starved	L	LH	0.333333
Starved	F	F	0.333333
Starved	F	FH	0.285714
Starved	F	FHM	0.0952381
Starved	I	H	0.142857
Starved	L	L	0.142857
Starved	F	F	0.333333
Starved	F	FH	0.0666667
Starved	F	FHM	0.133333
Starved	I	FF	0.133333
Starved	I	H	0.0666667
Starved	L	LH	0.133333
Starved	L	LHM	0.0666667
Starved	F	F	0.3
Starved	F	FH	0.2
Starved	F	FHM	0.1
Starved	I	FF	0.1
Starved	I	H	0.2
Starved	LQ	LQH	0.1
Sated	F	F	0.3
Sated	F	FH	0.25
Sated	I	FF	0.05
Sated	L	L	0.05
Sated	L	LHM	0.05
Sated	LQ	LQHM	0.05
Sated	O	RH	0.1
Starved	F	F	0.344828
Starved	F	FH	0.206897
Starved	I	FF	0.137931
Starved	L	L	0.103448
Starved	L	LHM	0.0344828
Starved	O	G	0.0344828
Starved	O	RH	0.0344828
Starved	F	F	0.0909091
Starved	F	FH	0.181818
Starved	F	FHM	0.0909091
Starved	L	L	0.181818
Starved	L	LH	0.0909091
Starved	L	LHM	0.0909091
Starved	LQ	LQH	0.0909091
Starved	O	G	0.181818
Starved	F	F	0.357143
Starved	I	FF	0.428571
Starved	I	H	0.142857
Starved	F	F	0.277778
Starved	I	FF	0.277778
Starved	I	H	0.111111
Starved	L	LH	0.0555556
Starved	L	LHM	0.111111
Starved	O	G	0.0555556
Starved	O	RH	0.0555556
Starved	F	F	0.266667
Starved	F	FH	0.133333
Starved	F	FHM	0.133333
Starved	I	FF	0.2
Starved	L	LH	0.0666667
Starved	LQ	LQHM	0.0666667
Starved	F	F	0.0430108
Starved	F	FH	0.11828
Starved	F	FHM	0.139785
Starved	I	FF	0.0215054
Starved	I	H	0.0967742
Starved	I	HM	0.0215054
Starved	L	LH	0.0430108
Starved	L	LHM	0.0537634
Starved	LQ	LQHM	0.0215054
Starved	O	D	0.0215054
Starved	O	G	0.0215054
Starved	O	RH	0.225806
Sated	F	F	0.16
Sated	F	FH	0.32
Sated	F	FHM	0.08
Sated	I	H	0.36
Sated	LQ	LQHM	0.04
Sated	O	RH	0.04
Sated	F	FH	0.185185
Sated	F	FHM	0.111111
Sated	I	FF	0.037037
Sated	I	H	0.259259
Sated	L	LHM	0.037037
Sated	LQ	LQH	0.185185
Sated	LQ	LQHM	0.185185
Sated	F	FH	0.214286
Sated	F	FHM	0.214286
Sated	I	FF	0.0714286
Sated	I	HM	0.0714286
Sated	L	LH	0.142857
Sated	L	LHM	0.142857
Sated	LQ	LQHM	0.0714286
Sated	O	RH	0.0714286
Sated	F	F	0.0416667
Sated	F	FH	0.222222
Sated	F	FHM	0.0416667
Sated	I	FF	0.0555556
Sated	I	H	0.111111
Sated	I	HM	0.0694444
Sated	LQ	LQHM	0.0416667
Sated	O	D	0.0138889
Sated	O	G	0.0416667
Sated	O	RH	0.25
Starved	I	FF	0.0606061
Starved	I	H	0.030303
Starved	I	HM	0.0606061
Starved	L	LH	0.151515
Starved	L	LHM	0.0606061
Starved	LQ	LQH	0.0909091
Starved	F	FH	0.113924
Starved	F	FHM	0.101266
Starved	I	FF	0.0632911
Starved	I	H	0.101266
Starved	I	HM	0.139241
Starved	L	LH	0.0632911
Starved	L	LHM	0.21519
Starved	O	D	0.177215
Starved	O	RH	0.0886076
Starved	F	F	0.0116279
Starved	F	FH	0.0581395
Starved	F	FHM	0.255814
Starved	I	FF	0.0348837
Starved	I	H	0.116279
Starved	I	HM	0.255814
Starved	L	LHM	0.0348837
Starved	LQ	LQHM	0.127907
Starved	O	RH	0.0116279
Starved	F	F	0.114286
Starved	F	FH	0.542857
Starved	F	FHM	0.0571429
Starved	I	H	0.0285714
Starved	I	HM	0.0285714
Starved	L	LH	0.0285714
Starved	LQ	LQHM	0.0857143
Starved	O	RH	0.0571429

## Sheet: Fig1C
Behavior	Value
F	0.966667
I	0.9
L	0.866667
LQ	0.633333
O	0.6

## Sheet: Fig1D
time	fly	behavior
45	A_sated1	F
144	A_sated1	H
323	A_sated1	F
615	A_sated1	H
671	A_sated1	H
764	A_sated1	H
960	A_sated1	FH
1007	A_sated1	RH
1009	A_sated1	F
1053	A_sated1	FH
1306	A_sated1	FH
1346	A_sated1	F
1673	A_sated1	FH
1687	A_sated1	H
1829	A_sated1	UC
1857	A_sated1	FH
1868	A_sated1	FH
2062	A_sated1	LQHM
2510	A_sated1	FH
2776	A_sated1	UC
2865	A_sated1	FH
2891	A_sated1	H
1109	A_sated1	FHM
3045	A_sated1	H
3245	A_sated1	UC
3264	A_sated1	H
3399	A_sated1	FHM
30	A_sated2	LQHM
34	A_sated2	FF
42	A_sated2	FH
243	A_sated2	FH
38	A_sated3	HM
78	A_sated3	FH
271	A_sated3	FF
291	A_sated3	L
623	A_sated3	LHM
631	A_sated3	FH
636	A_sated3	RHB
2005	A_sated3	FHM
2136	A_sated3	H
2171	A_sated3	FHM
2176	A_sated3	RHB
2516	A_sated3	LHM
2522	A_sated3	RHB
8	A_sated4	F
65	A_sated4	D
73	A_sated4	RH
197	A_sated4	FF
293	A_sated4	FF
896	A_sated4	UC
1055	A_sated4	FHM
1268	A_sated4	FHM
1438	A_sated4	RHB
1524	A_sated4	FHM
1633	A_sated4	LHM
1640	A_sated4	RH
1939	A_sated4	F
2024	A_sated4	RH
2027	A_sated4	F
2263	A_sated4	FH
2268	A_sated4	RHB
2717	A_sated4	FF
2941	A_sated4	LHM
2957	A_sated4	RH
2962	A_sated4	FF
2989	A_sated4	RH
3141	A_sated4	FH
3148	A_sated4	RH
3270	A_sated4	RH
3274	A_sated4	LQHM
3282	A_sated4	RH
3445	A_sated4	LHM
55	starved1	LQHM
78	starved1	LQHM
93	starved1	FF
350	starved1	UC
355	starved1	LH
372	starved1	H
687	starved1	LQHM
788	starved1	LQHM
796	starved1	LQHM
805	starved1	HM
1577	starved1	LH
1584	starved1	LH
1563	starved1	LQH
1638	starved1	LHM
1651	starved1	HM
1657	starved1	FF
2246	starved1	LQHM
3202	starved1	LQHM
3305	starved1	LHM
87	starved2	FHM
166	starved2	FH
168	starved2	LQHM
181	starved2	RH
184	starved2	HM
212	starved2	FH
233	starved2	LQHM
250	starved2	LQHM
385	starved2	LQHM
467	starved2	FHM
492	starved2	LQHM
524	starved2	HM
567	starved2	F
575	starved2	HM
585	starved2	FH
623	starved2	FHM
707	starved2	LQHM
753	starved2	FHM
800	starved2	HM
802	starved2	FF
826	starved2	FHM
848	starved2	HM
876	starved2	HM
890	starved2	H
1004	starved2	LQHM
1048	starved2	LQHM
1068	starved2	UC
1078	starved2	FHM
1154	starved2	HM
1176	starved2	HM
1200	starved2	HM
1220	starved2	FH
1229	starved2	FF
1248	starved2	FHM
1292	starved2	FF
1366	starved2	FHM
1372	starved2	FHM
1391	starved2	HM
1414	starved2	LHM
1456	starved2	HM
1477	starved2	HM
21	starved3	LQHM
45	starved3	LQHM
70	starved3	LH
100	starved3	FH
130	starved3	UC
180	starved3	FH
198	starved3	H
216	starved3	F
326	starved3	FH
364	starved3	F
572	starved3	FH
681	starved3	F
771	starved3	F
1001	starved3	F
1140	starved3	FH
1149	starved3	HM
1229	starved3	LQHM
1236	starved3	RH
1350	starved3	FH
1485	starved3	FH
1600	starved3	FH
1603	starved3	FH
1629	starved3	FH
1630	starved3	RH
1632	starved3	FH
1693	starved3	FHM
1791	starved3	FH
1886	starved3	FH
2132	starved3	FHM
2237	starved3	FH
2609	starved3	FH
2787	starved3	FH
2835	starved3	FH
2837	starved3	FH
2838	starved3	FH
23	starved4	RHB
25	starved4	FH
36	starved4	FHM
320	starved4	FH
387	starved4	FHM
550	starved4	FH
655	starved4	FHM
740	starved4	FH
915	starved4	FF
938	starved4	H
1040	starved4	LHM
1081	starved4	RH
1133	starved4	FF
1161	starved4	FHM
1160	starved4	FH
1192	starved4	RHB
1321	starved4	HM
1324	starved4	RH
1406	starved4	FH
1409	starved4	RHB
1431	starved4	L
1437	starved4	RHB
1562	starved4	RH
1564	starved4	LHM
1633	starved4	UC
1635	starved4	RHB
2227	starved4	LH
2255	starved4	L
2262	starved4	RHB
2311	starved4	H
2312	starved4	RHB
2569	starved4	FHM
2578	starved4	RH
2581	starved4	FH

## Sheet: Fig1E
Starved
behavior	grooming	other	fast	long	interaction
grooming	0.2647	0	0.3529	0.2647	0.1176
other	0	0	0	0	0
fast	0.0636	0	0.6821	0.1387	0.1156
long	0.1667	0	0.3788	0.3182	0.1364
interaction	0.0588	0	0.4314	0.1765	0.3333
Sated
behavior	grooming	other	fast	long	interaction
grooming	0.0435	0	0.6957	0.2609	0
other	1	0	0	0	0
fast	0.1494	0.0115	0.5862	0.1494	0.1034
long	0.3478	0	0.4348	0.1739	0.0435
interaction	0	0	0.7692	0	0.2308

## Sheet: Fig1F
Treatment	Behavior	Value
Normal	F	0.611111
Normal	L	0.277778
Normal	LQ	0.111111
Meal	F	0.433333
Meal	L	0.3
Meal	LQ	0.266667
Normal	F	0.552632
Normal	L	0.368421
Normal	LQ	0.0789474
Meal	F	0.428571
Meal	L	0.142857
Meal	LQ	0.428571
Normal	F	0.354839
Normal	L	0.483871
Normal	LQ	0.16129
Meal	F	0.310345
Meal	L	0.448276
Meal	LQ	0.241379
Normal	F	0.733333
Normal	L	0.15
Normal	LQ	0.116667
Meal	F	0.666667
Meal	L	0.277778
Meal	LQ	0.0555556
Normal	F	0.672727
Normal	L	0.254545
Normal	LQ	0.0727273
Meal	F	0.608696
Meal	L	0.173913
Meal	LQ	0.217391
Normal	F	0.375
Normal	L	0.3125
Normal	LQ	0.3125
Meal	F	0.689655
Meal	L	0.103448
Meal	LQ	0.206897
Normal	F	0.388889
Normal	L	0.444444
Normal	LQ	0.166667
Meal	F	0.571429
Meal	L	0.285714
Meal	LQ	0.142857
Normal	F	0.52381
Normal	L	0.285714
Normal	LQ	0.190476
Meal	F	0.576923
Meal	L	0.115385
Meal	LQ	0.307692
Normal	F	0.578947
Normal	L	0.263158
Normal	LQ	0.157895
Meal	F	0.173913
Meal	L	0.652174
Meal	LQ	0.173913
