# Supplementary material for: Behavioral dissection of hunger states in Drosophila
Source: eLife. 2023 Jun 16;12:RP84537. doi: 10.7554/eLife.84537 (PMC10328523; doi:10.7554/eLife.84537)
Supplement: Figure 2—source data 1. [file elife-84537-fig2-data1.xls]

## Sheet: Fig2D_I
Event	Duration	TotalIntensity	AvgIntensity	MinIntensity	MaxIntensity	VarIntensity	EventType
1	1.6	100	12.5	4	18	20.2857	F
2	3.2	755	47.1875	8	77	390.962	F
3	2	263	26.3	3	88	659.344	F
4	3.2	814	50.875	3	99	725.05	F
5	2.2	282	25.6364	5	38	109.055	F
13	2	336	33.6	8	91	778.711	F
19	5.8	1235	42.5862	10	73	300.608	F
23	2	228	22.8	9	44	119.511	F
26	1.6	85	10.625	3	20	38.2679	F
31	3.2	967	60.4375	3	141	1716.8	F
32	0.8	69	17.25	7	32	116.917	F
34	3.4	636	37.4118	6	66	311.507	F
1	2.4	269	22.4167	3	46	138.447	F
7	4.2	455	21.6667	4	52	178.233	F
10	2.8	344	24.5714	3	40	96.8791	F
11	2.4	278	23.1667	6	35	82.1515	F
14	2.4	360	30	6	54	255.818	F
15	1.8	126	14	6	21	32	F
16	2.4	320	26.6667	9	44	102.788	F
17	0.4	22	11	10	12	2	F
18	3	449	29.9333	3	53	109.067	F
19	3.6	400	22.2222	12	29	21.8301	F
21	1.4	69	9.85714	6	15	11.8095	F
22	1.4	98	14	6	18	21	F
23	3.2	252	15.75	6	29	29.5333	F
24	5	629	25.16	9	89	398.64	F
25	2.2	227	20.6364	4	34	87.8545	F
26	3	370	24.6667	3	40	137.381	F
27	2.8	496	35.4286	7	102	917.802	F
28	1.8	115	12.7778	6	19	22.9444	F
35	3.4	677	39.8235	5	102	1105.65	F
36	0.8	61	15.25	9	22	30.9167	F
44	4	1041	52.05	9	160	2085.84	F
46	2.6	429	33	7	68	364.5	F
47	2.8	133	9.5	5	16	14.5769	F
51	3.8	401	21.1053	8	30	39.0994	F
52	4.2	528	25.1429	5	36	53.4286	F
53	1.6	140	17.5	6	24	38.5714	F
59	4.6	579	25.1739	6	46	153.877	F
60	0.8	58	14.5	4	21	61.6667	F
61	3	425	28.3333	10	44	149.095	F
62	5.4	534	19.7778	6	42	108.103	F
75	3.8	232	12.2105	3	24	63.3977	F
76	0.6	25	8.33333	4	14	26.3333	F
77	4.6	603	26.2174	9	47	107.542	F
82	2.2	131	11.9091	3	24	44.8909	F
83	3	333	22.2	6	33	80.3143	F
85	7.2	852	23.6667	8	38	45.8286	F
93	3	468	31.2	3	59	175.029	F
94	0.6	44	14.6667	6	28	137.333	F
10	3.2	1909	119.312	18	178	2973.16	F
12	1	90	18	10	23	36.5	F
13	0.6	43	14.3333	9	21	37.3333	F
15	1.2	128	21.3333	8	34	91.8667	F
17	6	874	29.1333	3	69	322.533	F
18	4	1115	55.75	7	108	1696.3	F
25	2.6	429	33	9	56	143	F
26	2.2	358	32.5455	7	44	172.273	F
31	3	788	52.5333	4	144	1637.27	F
34	5.4	1383	51.2222	3	125	1675.1	F
35	2.8	220	15.7143	7	22	16.989	F
39	3.8	893	47	3	118	964.778	F
43	4.8	757	31.5417	4	95	419.216	F
44	1.4	122	17.4286	9	23	22.619	F
53	9	2774	61.6444	11	124	1046.55	F
56	2.2	630	57.2727	7	103	1044.02	F
58	4.2	1131	53.8571	6	151	1681.43	F
61	2	803	80.3	5	167	3662.9	F
64	1.6	180	22.5	3	36	211.429	F
65	0.8	81	20.25	7	32	185.583	F
66	0.8	106	26.5	12	35	113.667	F
4	5	357	14.28	3	43	100.543	F
5	1.8	169	18.7778	7	41	139.194	F
3	8.2	665	16.2195	3	51	123.126	F
4	3.2	348	21.75	3	49	271.533	F
5	3	305	20.3333	5	44	215.381	F
8	3.6	305	16.9444	3	42	148.526	F
13	3	469	31.2667	3	72	491.352	F
14	1.8	130	14.4444	3	27	49.5278	F
17	2.4	168	14	3	35	107.091	F
24	4.4	414	18.8182	4	59	365.203	F
25	2.4	102	8.5	3	16	25	F
40	6.6	276	8.36364	4	14	13.4886	F
41	2.8	96	6.85714	3	11	8.9011	F
44	1.6	147	18.375	7	32	92.5536	F
45	0.6	23	7.66667	6	11	8.33333	F
46	6.2	688	22.1935	4	61	345.561	F
47	3.6	356	19.7778	3	42	239.359	F
48	6.6	722	21.8788	4	76	411.985	F
1	1.8	318	35.3333	4	74	676.25	F
2	4.8	1868	77.8333	13	118	1158.75	F
3	1.6	93	11.625	3	18	25.4107	F
6	1.8	570	63.3333	11	119	1645.5	F
7	1	86	17.2	10	23	24.2	F
15	2.4	336	28	10	62	259.455	F
19	1.6	257	32.125	3	65	521.839	F
22	3.8	633	33.3158	3	82	400.561	F
29	2.2	425	38.6364	3	109	1228.85	F
30	1.4	258	36.8571	9	68	560.476	F
31	2.8	667	47.6429	4	110	1814.09	F
33	1.4	287	41	6	90	1210.67	F
34	1	61	12.2	5	18	30.2	F
36	0.6	41	13.6667	10	20	30.3333	F
39	3.2	473	29.5625	5	78	610.529	F
42	3.8	797	41.9474	6	101	959.608	F
48	2.4	583	48.5833	9	115	1317.72	F
49	7.6	1577	41.5	5	116	1075.01	F
50	3.2	783	48.9375	8	101	1104.6	F
51	4.4	1165	52.9545	5	142	1890.9	F
52	2.6	582	44.7692	12	94	957.359	F
53	2	682	68.2	19	152	1811.51	F
56	1.2	45	7.5	3	16	30.7	F
57	3	571	38.0667	3	116	1363.64	F
58	2.8	963	68.7857	7	139	2056.03	F
59	2.8	120	8.57143	3	20	21.6484	F
61	3.4	941	55.3529	7	104	1255.62	F
62	2.2	610	55.4545	3	132	2162.67	F
67	0.8	44	11	3	20	76.6667	F
68	6.6	701	21.2424	4	38	78.2519	F
69	2.4	225	18.75	6	40	98.3864	F
77	2.2	218	19.8182	5	32	78.5636	F
78	3.8	715	37.6316	5	126	1515.36	F
80	16.6	2129	25.6506	4	120	485.815	F
81	4.2	257	12.2381	3	21	29.5905	F
82	5	584	23.36	14	30	29.3233	F
88	1.4	99	14.1429	4	25	42.1429	F
90	1.8	133	14.7778	4	25	54.4444	F
95	1.2	81	13.5	6	20	32.3	F
96	1.2	61	10.1667	8	13	5.76667	F
107	2.2	292	26.5455	3	52	192.673	F
108	0.6	43	14.3333	8	18	30.3333	F
109	5	607	24.28	10	45	72.46	F
110	0.8	45	11.25	3	18	38.9167	F
121	0.4	18	9	7	11	8	F
122	1.4	65	9.28571	3	24	53.5714	F
123	0.4	29	14.5	14	15	0.5	F
10	0.6	105	35	24	51	201	I
11	6	1026	34.2	11	52	84.3724	I
29	5.2	1337	51.4231	10	91	304.254	I
30	0.8	182	45.5	30	62	171.667	I
38	0.6	64	21.3333	17	27	26.3333	I
40	1.8	79	8.77778	4	11	4.94444	I
2	2.2	386	35.0909	15	51	181.891	I
3	0.8	73	18.25	6	26	77.5833	I
5	1.6	68	8.5	3	14	11.1429	I
20	2	84	8.4	3	12	7.6	I
31	1.8	153	17	4	24	34.5	I
37	0.6	43	14.3333	10	19	20.3333	I
38	2.4	194	16.1667	3	27	72.3333	I
48	1.8	159	17.6667	5	24	54.25	I
54	7.4	837	22.6216	7	52	139.02	I
55	5.6	516	18.4286	3	33	55.0688	I
56	4.8	644	26.8333	8	55	169.71	I
57	4.6	488	21.2174	4	29	37.6324	I
66	3	212	14.1333	3	28	52.5524	I
67	2.4	177	14.75	5	24	34.3864	I
68	12.4	1670	26.9355	6	48	106.488	I
70	1.6	138	17.25	5	26	61.3571	I
71	3.4	424	24.9412	4	39	85.9338	I
74	4	559	27.95	8	38	66.8921	I
78	3.8	360	18.9474	3	33	65.2749	I
89	2.8	290	20.7143	4	42	174.527	I
90	2.6	257	19.7692	4	31	53.5256	I
91	3.4	486	28.5882	4	45	98.8824	I
92	1.2	69	11.5	6	16	14.3	I
95	6.2	663	21.3871	7	39	80.1118	I
98	0.6	31	10.3333	7	13	9.33333	I
99	0.6	42	14	7	21	49	I
1	0.6	47	15.6667	5	26	110.333	I
2	3.6	1726	95.8889	5	180	3713.28	I
3	1.4	437	62.4286	17	100	1090.29	I
4	0.6	27	9	5	11	12	I
7	0.6	54	18	3	34	241	I
8	1	234	46.8	17	71	609.2	I
9	1.4	129	18.4286	4	26	60.619	I
11	0.6	58	19.3333	4	29	180.333	I
14	0.8	52	13	5	21	59.3333	I
16	2.4	322	26.8333	3	50	217.242	I
19	1.6	171	21.375	11	30	68.8393	I
20	0.8	38	9.5	3	13	19.6667	I
21	0.8	42	10.5	5	15	23	I
22	6.2	1444	46.5806	12	75	432.718	I
23	1	176	35.2	25	45	83.2	I
29	3.2	386	24.125	11	35	44.3833	I
30	1.8	167	18.5556	12	24	13.5278	I
32	0.6	28	9.33333	4	13	22.3333	I
33	1.4	86	12.2857	3	24	78.5714	I
36	3.2	571	35.6875	17	62	166.896	I
37	1	53	10.6	3	14	20.8	I
38	0.4	25	12.5	12	13	0.5	I
40	1.6	487	60.875	18	83	643.554	I
41	0.4	24	12	9	15	18	I
42	0.4	26	13	12	14	2	I
49	4.8	907	37.7917	4	59	216.607	I
50	0.8	90	22.5	11	38	164.333	I
51	0.8	37	9.25	3	14	31.5833	I
52	1.8	169	18.7778	4	28	70.6944	I
54	0.6	36	12	4	17	49	I
55	5.8	1083	37.3448	5	74	245.663	I
57	2.6	340	26.1538	5	37	87.8077	I
60	1.8	195	21.6667	3	35	92.25	I
1	0.6	23	7.66667	5	13	21.3333	I
1	0.4	30	15	5	25	200	I
2	3.2	791	49.4375	17	69	227.062	I
28	8.8	442	10.0455	3	15	12.9746	I
30	3.6	130	7.22222	3	13	9.00654	I
31	0.6	31	10.3333	8	14	10.3333	I
35	19.8	1315	13.2828	3	29	27.3478	I
36	9.6	550	11.4583	3	20	17.3599	I
37	1.4	82	11.7143	3	25	58.5714	I
39	1.8	57	6.33333	4	11	4.5	I
50	5.2	1166	44.8462	3	85	525.895	I
4	1.4	130	18.5714	12	26	33.2857	I
5	1	125	25	6	40	280	I
12	0.4	25	12.5	11	14	4.5	I
16	1.6	86	10.75	5	16	16.5	I
17	0.6	54	18	4	28	156	I
21	1.6	293	36.625	5	95	1085.98	I
46	0.6	82	27.3333	18	32	65.3333	I
47	1.2	140	23.3333	9	42	163.067	I
60	1.2	105	17.5	8	27	59.5	I
65	2.2	144	13.0909	3	27	60.0909	I
66	0.6	37	12.3333	10	15	6.33333	I
73	0.8	40	10	3	17	43.3333	I
74	0.8	35	8.75	4	12	11.5833	I
75	0.4	41	20.5	20	21	0.5	I
76	0.6	31	10.3333	6	17	34.3333	I
79	1.2	59	9.83333	3	15	16.1667	I
83	0.6	23	7.66667	3	12	20.3333	I
89	2.8	500	35.7143	18	54	113.297	I
91	0.6	41	13.6667	9	19	25.3333	I
94	1.4	60	8.57143	4	14	13.2857	I
99	4.2	388	18.4762	6	34	51.9619	I
100	4.6	448	19.4783	10	56	171.715	I
101	4.4	1180	53.6364	4	109	1222.34	I
102	3.8	295	15.5263	8	24	19.2632	I
103	9.6	2196	45.75	5	117	811.723	I
111	1.2	45	7.5	3	12	14.7	I
115	10.6	1846	34.8302	4	127	663.336	I
116	1	135	27	5	47	375.5	I
124	2	222	22.2	4	61	300.844	I
125	1.4	84	12	4	16	16	I
126	3.6	260	14.4444	3	35	83.5556	I
127	3	619	41.2667	24	72	170.924	I
128	3.2	274	17.125	6	34	60.1167	I
129	0.4	17	8.5	6	11	12.5	I
130	1.4	139	19.8571	3	32	120.143	I
133	9.4	1771	37.6809	3	95	526.092	I
134	1.4	58	8.28571	4	17	22.9048	I
135	0.6	25	8.33333	6	11	6.33333	I
136	5	409	16.36	5	23	20.8233	I
137	9.2	1208	26.2609	3	36	53.7082	I
140	9.6	2318	48.2917	8	166	2002.25	I
141	2.2	192	17.4545	3	30	46.2727	I
142	5.8	859	29.6207	5	42	118.887	I
143	0.6	30	10	3	17	49	I
144	4.2	1073	51.0952	8	140	1559.69	I
146	2.6	155	11.9231	3	18	24.4103	I
6	1.4	141	20.1429	3	33	105.81	L
7	3.6	278	15.4444	5	23	31.085	L
12	7.8	1790	45.8974	3	123	740.516	L
14	3.8	577	30.3684	12	54	89.3567	L
15	0.6	25	8.33333	4	15	34.3333	L
16	5.4	1311	48.5556	21	80	291.718	L
17	7.2	1294	35.9444	5	57	244.968	L
18	9	2625	58.3333	7	110	600.818	L
27	3.6	678	37.6667	3	78	416.471	L
28	1	48	9.6	4	21	54.3	L
41	0.8	78	19.5	7	32	124.333	L
42	2.8	948	67.7143	19	103	625.912	L
43	0.6	74	24.6667	14	31	86.3333	L
44	0.4	32	16	12	20	32	L
45	4.2	1225	58.3333	19	97	334.433	L
46	5.8	2241	77.2759	10	127	809.707	L
8	2.4	251	20.9167	4	43	195.902	L
9	1.4	216	30.8571	3	61	328.81	L
12	2.4	153	12.75	4	21	32.3864	L
13	1.4	180	25.7143	3	49	399.905	L
29	3.8	792	41.6842	5	65	291.117	L
30	6.4	626	19.5625	3	36	62.8992	L
32	4	544	27.2	3	62	192.379	L
33	1	40	8	5	13	14	L
34	3.2	132	8.25	3	15	10.3333	L
40	12.6	2323	36.873	11	63	143.274	L
41	0.8	39	9.75	4	15	22.9167	L
42	0.8	53	13.25	7	20	34.25	L
43	3.8	256	13.4737	6	29	43.5965	L
65	14.6	781	10.6986	3	28	61.6857	L
72	4.2	558	26.5714	6	48	155.657	L
79	1	82	16.4	7	24	41.3	L
80	0.4	39	19.5	17	22	12.5	L
81	6.4	811	25.3438	4	54	103.072	L
47	13.2	3223	48.8333	14	66	98.3256	L
6	8.4	839	19.9762	3	41	70.5116	L
7	0.6	36	12	4	19	57	L
8	2	124	12.4	5	18	21.3778	L
9	7.6	657	17.2895	3	49	155.238	L
10	6.6	791	23.9697	4	80	356.718	L
11	1	56	11.2	4	19	34.2	L
13	5.4	479	17.7407	3	64	252.815	L
6	6	513	17.1	3	38	132.3	L
7	2.2	270	24.5455	4	49	275.673	L
11	4	450	22.5	3	56	315.211	L
12	22.4	2884	25.75	3	62	124.766	L
18	1	37	7.4	4	11	7.3	L
19	2.8	266	19	3	38	199.538	L
20	9.6	845	17.6042	3	65	303.521	L
21	10.8	1116	20.6667	4	75	314.981	L
26	8.2	476	11.6098	5	29	33.8439	L
27	6	549	18.3	3	36	47.1138	L
43	10.4	720	13.8462	3	38	118.133	L
9	4.4	806	36.6364	7	108	1055.29	L
11	1.2	88	14.6667	4	21	34.2667	L
13	1.6	130	16.25	3	22	43.3571	L
14	9	3798	84.4	16	168	1636.7	L
18	2.2	523	47.5455	3	124	1673.07	L
20	8	1064	26.6	3	74	275.99	L
23	14	6439	91.9857	3	195	2472.01	L
24	2.2	408	37.0909	12	62	265.691	L
38	4.6	802	34.8696	3	69	487.482	L
43	3.6	1540	85.5556	7	155	2959.08	L
63	6.2	698	22.5161	3	75	278.525	L
64	3.2	269	16.8125	3	31	93.6292	L
70	3	230	15.3333	5	25	22.9524	L
71	6.8	654	19.2353	3	38	106.428	L
72	5	505	20.2	5	31	50	L
87	10.4	2463	47.3654	7	142	1025.1	L
98	12	1706	28.4333	6	81	247.775	L
104	6	641	21.3667	3	40	89.3437	L
105	5.4	555	20.5556	3	61	171.564	L
106	2.4	233	19.4167	13	30	19.9015	L
112	1.8	174	19.3333	3	34	103	L
