# Supplementary material for: Behavioral dissection of hunger states in Drosophila
Source: eLife. 2023 Jun 16;12:RP84537. doi: 10.7554/eLife.84537 (PMC10328523; doi:10.7554/eLife.84537)
Supplement: Figure 3—source data 1. [file elife-84537-fig3-data1.xls]

## Sheet: Fig3B
Treatment	Well	Events
sated	yeast	15
sated	sucrose	17
sated	yeast	14
sated	sucrose	17
sated	yeast	4
sated	sucrose	3
starved	yeast	48
starved	sucrose	14
starved	yeast	23
starved	sucrose	28
starved	yeast	83
starved	sucrose	68
starved	yeast	51
starved	sucrose	50
starved	sucrose	21
starved	yeast	66
starved	sucrose	25
starved	yeast	54
starved	sucrose	16
starved	yeast	26
sated	sucrose	1
sated	yeast	46
sated	sucrose	15
sated	yeast	22
sated	sucrose	8
sated	yeast	4
sated	sucrose	30
sated	yeast	41
sated	sucrose	20
sated	yeast	34
starved	sucrose	10
starved	yeast	34
starved	sucrose	12
starved	yeast	61
sated	yeast	17
sated	sucrose	20
sated	yeast	7
sated	sucrose	5
starved	yeast	57
starved	sucrose	69
sated	yeast	30
sated	sucrose	26
sated	yeast	19
sated	sucrose	14
starved	sucrose	5
starved	yeast	8
sated	sucrose	8
sated	yeast	13
sated	sucrose	29
sated	yeast	33
sated	sucrose	59
sated	yeast	43
sated	sucrose	11
sated	yeast	10
sated	sucrose	13
sated	yeast	15
sated	sucrose	16
sated	yeast	34
starved	sucrose	18
starved	yeast	32
starved	sucrose	19
starved	yeast	40
starved	sucrose	8
starved	yeast	82

## Sheet: Fig3C_G
Treatment	Well	FoodChoice	Events	MedDuration
female	sucrose	S2	67	4.4
female	sucrose	S2	47	3.8
female	sucrose	S2	23	3.2
female	sucrose	S2	1	0.6
female	sucrose	S2	10	4.9
female	sucrose	S2	5	5.4
female	sucrose	S2	13	3.2
female	sucrose	S2	20	2.6
female	sucrose	S2	23	2.8
female	sucrose	S2	1	2.8
female	sucrose	S2	9	9
male	sucrose	S2	51	4.2
male	sucrose	S2	38	7.1
male	sucrose	S2	1	1.6
male	sucrose	S2	8	2
male	sucrose	S2	15	3.4
male	sucrose	S2	3	2
male	sucrose	S2	33	3.2
male	sucrose	S2	13	2.6
male	sucrose	S2	3	3.8
male	sucrose	S2	15	4.2
female	sucrose	S20	53	4.4
female	sucrose	S20	1	7
female	sucrose	S20	27	6.4
female	sucrose	S20	5	1.6
female	sucrose	S20	2	0.8
female	sucrose	S20	76	7.8
female	sucrose	S20	22	5.9
female	sucrose	S20	16	2.9
female	sucrose	S20	19	3
female	sucrose	S20	51	3.2
male	sucrose	S20	14	6.6
male	sucrose	S20	17	5.4
male	sucrose	S20	3	3.2
male	sucrose	S20	41	6
male	sucrose	S20	25	6.4
male	sucrose	S20	1	1.6
male	sucrose	S20	2	5.7
male	sucrose	S20	3	5.8
male	sucrose	S20	6	3.5
male	sucrose	S20	1	6
male	sucrose	S20	91	3
female	yeast	S2	86	9.2
female	yeast	S2	67	6.4
female	yeast	S2	42	5.9
female	yeast	S20	62	3
female	yeast	S20	73	7.4
female	yeast	S20	8	5.2
female	yeast	S2	8	6.8
female	yeast	S2	50	10.4
female	yeast	S20	42	1.7
female	yeast	S20	39	4.6
female	yeast	S20	23	4.6
female	yeast	S2	39	6.6
female	yeast	S2	27	6.6
female	yeast	S2	30	7
female	yeast	S20	71	2.2
female	yeast	S20	83	6.4
female	yeast	S2	36	5.4
female	yeast	S2	26	3.1
female	yeast	S2	24	4.4
female	yeast	S20	19	2.4
female	yeast	S20	37	2.4
female	yeast	S20	56	6.3
male	yeast	S2	51	2.2
male	yeast	S2	49	4.4
male	yeast	S20	20	3
male	yeast	S20	33	1.8
male	yeast	S20	14	4.8
male	yeast	S2	9	3.6
male	yeast	S2	28	3.9
male	yeast	S2	20	3.6
male	yeast	S20	28	0.6
male	yeast	S20	28	2.1
male	yeast	S20	7	2
male	yeast	S2	9	6.6
male	yeast	S2	32	5.1
male	yeast	S20	7	1.4
male	yeast	S20	12	0.7
male	yeast	S20	18	2.9
male	yeast	S2	9	3.4
male	yeast	S2	5	6.2
male	yeast	S2	35	6.4
male	yeast	S20	31	2.6
male	yeast	S20	3	1
male	yeast	S20	111	2.4
female	sucrose	S2	4	4.6
female	sucrose	S2	2	3.3
female	sucrose	S2	7	8
female	sucrose	S2	2	3.7
female	sucrose	S2	3	2
female	sucrose	S2	6	5
female	sucrose	S2	33	2.8
female	sucrose	S2	11	2.4
female	sucrose	S2	9	2.2
female	sucrose	S2	14	3.3
female	sucrose	S2	9	2.4
male	sucrose	S2	29	2.4
male	sucrose	S2	5	2.8
male	sucrose	S2	20	3.6
male	sucrose	S2	10	4.6
male	sucrose	S2	45	2
male	sucrose	S2	3	3
male	sucrose	S2	5	6
male	sucrose	S2	1	2.2
female	sucrose	S20	27	3.4
female	sucrose	S20	13	8.4
female	sucrose	S20	39	4.8
female	sucrose	S20	18	5.3
female	sucrose	S20	21	6.4
female	sucrose	S20	32	7.7
female	sucrose	S20	72	6.9
female	sucrose	S20	17	5.2
female	sucrose	S20	23	2.8
male	sucrose	S20	35	7.2
male	sucrose	S20	8	7.2
male	sucrose	S20	14	6.1
male	sucrose	S20	2	8.2
male	sucrose	S20	3	2.2
male	sucrose	S20	89	6
male	sucrose	S20	6	6.1
male	sucrose	S20	31	4.2
male	sucrose	S20	10	3.5
female	yeast	S2	72	8.4
female	yeast	S2	50	6.9
female	yeast	S20	59	2
female	yeast	S20	31	5
female	yeast	S2	28	13.1
female	yeast	S2	53	10
female	yeast	S20	40	2.1
female	yeast	S2	11	7.6
female	yeast	S2	70	4.9
female	yeast	S2	22	4.3
female	yeast	S20	44	6.8
female	yeast	S20	15	6
female	yeast	S20	63	12.8
female	yeast	S2	46	4.1
female	yeast	S2	30	6.9
female	yeast	S2	19	5.4
female	yeast	S20	53	6.8
female	yeast	S20	35	6.6
female	yeast	S20	33	2.4
male	yeast	S2	55	3.8
male	yeast	S20	42	3.6
male	yeast	S20	5	1.8
male	yeast	S20	15	2.2
male	yeast	S2	20	5.8
male	yeast	S2	61	3.4
male	yeast	S20	3	1
male	yeast	S20	12	1.1
male	yeast	S20	74	2
male	yeast	S2	19	4.2
male	yeast	S2	48	4.3
male	yeast	S2	7	10
male	yeast	S20	7	9
male	yeast	S2	13	3.8
male	yeast	S2	3	1.6
male	yeast	S20	29	1.6
male	yeast	S20	10	5.7

## Sheet: Fig3H_I_S3A
Treatment	FoodChoice	Events	MedDuration
C_Arabinose	Sugar	15	5.2
C_Arabinose	Sugar	53	5
C_Arabinose	Sugar	46	4.2
C_Arabinose	Sugar	12	3.9
C_Arabinose	Sugar	1	3.6
C_Arabinose	Sugar	24	5.4
C_Arabinose	Sugar	58	4.9
C_Arabinose	Sugar	1	1.2
C_Arabinose	Sugar	46	9.4
C_Arabinose	Sugar	39	3.8
C_Arabinose	Sugar	12	3.2
C_Arabinose	Sugar	46	9.6
A_S2	Sugar	6	3.6
A_S2	Sugar	11	2.8
A_S2	Sugar	11	1
A_S2	Sugar	21	3
A_S2	Sugar	12	1
A_S2	Sugar	20	4.4
A_S2	Sugar	38	2.7
A_S2	Sugar	73	4
A_S2	Sugar	9	2.8
A_S2	Sugar	53	3.4
B_S20	Sugar	35	5.6
B_S20	Sugar	87	4.8
B_S20	Sugar	42	4.6
B_S20	Sugar	34	4
B_S20	Sugar	40	3.9
B_S20	Sugar	19	6.8
B_S20	Sugar	15	3.4
B_S20	Sugar	13	2.4
B_S20	Sugar	13	3.6
B_S20	Sugar	9	3.6
B_S20	Sugar	3	3.4
B_S20	Sugar	12	5.9
C_Arabinose	Yeast	50	5.7
C_Arabinose	Yeast	20	4.2
C_Arabinose	Yeast	60	12.9
C_Arabinose	Yeast	37	12
C_Arabinose	Yeast	23	6.2
C_Arabinose	Yeast	30	8.1
B_S20	Yeast	51	4.6
B_S20	Yeast	41	5.6
B_S20	Yeast	34	4.6
B_S20	Yeast	31	2.6
B_S20	Yeast	45	10
B_S20	Yeast	22	5.4
C_Arabinose	Yeast	83	6
C_Arabinose	Yeast	68	11.1
C_Arabinose	Yeast	61	9.2
C_Arabinose	Yeast	79	3.2
C_Arabinose	Yeast	25	10.2
C_Arabinose	Yeast	91	8
B_S20	Yeast	30	11.7
B_S20	Yeast	46	6.9
B_S20	Yeast	24	4.6
B_S20	Yeast	29	2.6
B_S20	Yeast	10	9.9
B_S20	Yeast	28	10.7
A_S2	Yeast	20	6.6
A_S2	Yeast	18	8.7
A_S2	Yeast	47	4.6
A_S2	Yeast	52	3
A_S2	Yeast	30	12.1
A_S2	Yeast	62	7.8
A_S2	Yeast	51	8.6
A_S2	Yeast	68	7.6
A_S2	Yeast	10	7.5
A_S2	Yeast	82	4
A_S2	Sugar	90	3.7
A_S2	Yeast	122	1.9
A_S2	Sugar	15	2.4
A_S2	Yeast	37	3.6
A_S2	Sugar	11	2.8
A_S2	Yeast	50	4.4
A_S2	Sugar	16	2.4
A_S2	Yeast	17	4
A_S2	Sugar	17	1.6
A_S2	Yeast	47	3
A_S2	Sugar	166	1.6
A_S2	Yeast	9	4.8
C_Arabinose	Yeast	35	2
C_Arabinose	Sugar	38	5.8
C_Arabinose	Yeast	35	1.6
C_Arabinose	Sugar	37	4
C_Arabinose	Yeast	38	1.4
C_Arabinose	Sugar	63	3.6
C_Arabinose	Yeast	52	2.6
C_Arabinose	Sugar	130	7.5
C_Arabinose	Yeast	57	2.8
C_Arabinose	Sugar	67	6.8
C_Arabinose	Yeast	33	2
C_Arabinose	Sugar	28	6.1
B_S20	Yeast	20	0.6
B_S20	Sugar	44	5.4
B_S20	Yeast	58	1.6
B_S20	Sugar	68	5.3
B_S20	Yeast	85	3.8
B_S20	Sugar	10	5.4
B_S20	Yeast	37	1
B_S20	Sugar	49	3
B_S20	Yeast	27	0.8
B_S20	Sugar	97	2.6
B_S20	Yeast	11	3.2
B_S20	Sugar	13	3
C_Arabinose	Sugar	41	2.8
C_Arabinose	Yeast	14	1
C_Arabinose	Sugar	80	4.1
C_Arabinose	Yeast	31	1
C_Arabinose	Sugar	30	4.8
C_Arabinose	Yeast	16	3.9
C_Arabinose	Sugar	15	2.8
C_Arabinose	Yeast	13	3.4
C_Arabinose	Sugar	13	2.8
C_Arabinose	Yeast	20	1.4
C_Arabinose	Sugar	60	4.8
C_Arabinose	Yeast	27	2
B_S20	Sugar	11	2.4
B_S20	Yeast	17	1.8
B_S20	Sugar	104	3.9
B_S20	Yeast	77	1.2
B_S20	Sugar	51	3.2
B_S20	Yeast	23	1.6
B_S20	Sugar	108	4.9
B_S20	Yeast	64	1.4
B_S20	Sugar	42	2.4
B_S20	Yeast	56	2.7
C_Arabinose	Sugar	59	5.8
C_Arabinose	Yeast	82	1.4
C_Arabinose	Sugar	46	6.1
C_Arabinose	Yeast	28	1.8
C_Arabinose	Sugar	115	5.4
C_Arabinose	Yeast	66	1.3
C_Arabinose	Sugar	54	5.6
C_Arabinose	Yeast	48	0.8
C_Arabinose	Sugar	62	4.4
C_Arabinose	Yeast	61	0.8
C_Arabinose	Sugar	27	3.2
C_Arabinose	Yeast	42	1.8
A_S2	Yeast	121	6
A_S2	Sugar	46	2.7
A_S2	Yeast	6	5.8
A_S2	Sugar	5	2.4
A_S2	Yeast	71	3.6
A_S2	Sugar	77	6.2
A_S2	Yeast	38	4.7
A_S2	Sugar	47	4.2
A_S2	Yeast	47	3.2
A_S2	Sugar	52	3
C_Arabinose	Yeast	29	4.6
C_Arabinose	Sugar	66	6.4
C_Arabinose	Yeast	91	6.2
C_Arabinose	Sugar	31	4
C_Arabinose	Yeast	14	4.1
C_Arabinose	Sugar	9	5.4
C_Arabinose	Yeast	39	4.2
C_Arabinose	Sugar	69	4
C_Arabinose	Yeast	5	5
C_Arabinose	Sugar	5	4.4

## Sheet: Fig3J_K
Treatment	Well	FoodChoice	Events	MedDuration
S2	sucrose	S2	72	1.9
S2	sucrose	S2	38	2.2
S2	sucrose	S2	88	1.5
S2	sucrose	S2	67	2.2
S2	sucrose	S2	16	3
S2	sucrose	S2	76	1.6
S2	sucrose	S2	10	1.1
S2	sucrose	S2	22	1.5
S2	sucrose	S2	16	3.3
S2	sucrose	S2	28	4.3
S2	sucrose	S2	14	1.5
S2	sucrose	S2	23	1.2
S20	sucrose	S20	119	4.2
S20	sucrose	S20	34	2.6
S20	sucrose	S20	50	4.8
S20	sucrose	S20	4	4
S20	sucrose	S20	14	2.6
S20	sucrose	S20	49	2.6
S20	sucrose	S20	40	5
S20	sucrose	S20	23	1.2
S20	sucrose	S20	15	3.2
S20	sucrose	S20	22	2.9
S20	sucrose	S20	9	3.2
sucrose2_sorbitol18	sucrose	sorbitol	19	1.6
sucrose2_sorbitol18	sucrose	sorbitol	37	1.6
sucrose2_sorbitol18	sucrose	sorbitol	20	1.3
sucrose2_sorbitol18	sucrose	sorbitol	14	2
sucrose2_sorbitol18	sucrose	sorbitol	32	4.3
sucrose2_sorbitol18	sucrose	sorbitol	30	2.4
sucrose2_sorbitol18	sucrose	sorbitol	106	3.4
sucrose2_sorbitol18	sucrose	sorbitol	15	3
sucrose2_sorbitol18	sucrose	sorbitol	50	1
sucrose2_sorbitol18	sucrose	sorbitol	23	2.6
sucrose2_sorbitol18	sucrose	sorbitol	19	1.4
S2	yeast	S2	39	1.4
S2	yeast	S2	25	0.8
S2	yeast	S2	66	1.3
S2	yeast	S2	84	2.4
S2	yeast	S2	18	2.1
S2	yeast	S2	73	2
S20	yeast	S20	90	1
S20	yeast	S20	43	1.8
S20	yeast	S20	96	3.8
S20	yeast	S20	8	7.8
S20	yeast	S20	9	0.8
sucrose2_sorbitol18	yeast	sorbitol	16	0.8
sucrose2_sorbitol18	yeast	sorbitol	50	1
sucrose2_sorbitol18	yeast	sorbitol	55	1.2
sucrose2_sorbitol18	yeast	sorbitol	10	1.3
sucrose2_sorbitol18	yeast	sorbitol	20	0.7
sucrose2_sorbitol18	yeast	sorbitol	16	1.6
sucrose2_sorbitol18	yeast	sorbitol	44	1.5
sucrose2_sorbitol18	yeast	sorbitol	28	2.1
sucrose2_sorbitol18	yeast	sorbitol	81	4.4
sucrose2_sorbitol18	yeast	sorbitol	35	1.2
sucrose2_sorbitol18	yeast	sorbitol	66	2
S2	yeast	S2	16	0.8
S2	yeast	S2	22	1.4
S2	yeast	S2	26	0.6
S2	yeast	S2	19	0.8
S2	yeast	S2	19	0.6
S2	yeast	S2	29	0.8
S20	yeast	S20	38	1.4
S20	yeast	S20	44	1.4
S20	yeast	S20	58	1
S20	yeast	S20	40	1.8
S20	yeast	S20	24	2.5
S20	yeast	S20	1	0.8

## Sheet: Fig3L_M_S3B
FoodChoice	Well	Events	MedDuration
S20	sucrose	13	2.95
S20	yeast	10	5.2
S20	sucrose	83	4.95
S20	yeast	86	2.95
S20	sucrose	2	10.8
S20	yeast	18	9.3
S20	sucrose	15	6.1
S20	yeast	18	2.05
S20	sucrose	207	3.8
S20	yeast	157	2.2
S20	sucrose	6	9
S20	yeast	12	6.2
S1	yeast	43	1.7
S1	sucrose	47	3.7
S1	yeast	79	3.3
S1	sucrose	34	2.9
S1	yeast	55	6.45
S1	sucrose	22	1.3
S1	yeast	27	5.45
S1	sucrose	21	3.45
S1	yeast	14	4.1
S1	sucrose	4	1.1
S1	yeast	9	6.4
S1	sucrose	4	4.3
S5	sucrose	2	3.4
S5	yeast	19	9.4
S5	sucrose	35	2.1
S5	yeast	42	1.55
S5	sucrose	4	1
S5	yeast	19	2.35
S5	sucrose	1	2
S5	yeast	29	7.7
S10	yeast	1571	1
S10	sucrose	25	2.9
S10	yeast	49	2.9
S10	sucrose	12	3.95
S10	yeast	32	5.7
S10	sucrose	12	1.8
S10	yeast	9	8.45
S10	sucrose	11	9.35
S10	yeast	34	8.55
S10	sucrose	4	4
S10	yeast	13	3.35
S10	sucrose	5	6.25
water	sucrose	17	2.6
water	yeast	45	4.9
water	sucrose	40	1.15
water	yeast	81	2.6
water	sucrose	8	1.7
water	yeast	39	5.25
water	sucrose	2	0.8
water	yeast	63	9.25
water	sucrose	12	0.7
water	yeast	27	6.05
water	sucrose	38	0.8
water	yeast	28	3.8
S20	yeast	69	3.2
S20	sucrose	42	3
S20	yeast	59	4.1
S20	sucrose	30	4.8
S1	sucrose	5	1.35
S1	yeast	48	5.2
S1	sucrose	22	2.5
S1	yeast	62	1.9
S1	sucrose	18	1.65
S1	yeast	41	2
S1	sucrose	11	3.05
S1	yeast	29	7.4
S1	sucrose	5	0.55
S1	yeast	71	5
S5	yeast	46	2.3
S5	sucrose	28	5.5
S5	yeast	34	7
S5	sucrose	5	4.3
S5	yeast	34	6.1
S5	sucrose	14	1
S5	yeast	26	1.1
S5	sucrose	29	3.8
S5	yeast	16	2.25
S5	sucrose	10	2.65
S5	yeast	34	3.1
S5	sucrose	8	4.1
S10	sucrose	4	4.1
S10	yeast	23	4.65
S10	sucrose	26	1.15
S10	yeast	36	3
S10	sucrose	13	4.55
S10	yeast	29	4.35
S10	sucrose	31	4.95
S10	yeast	73	3.55
S20	sucrose	57	2
S20	yeast	72	1.4
S20	sucrose	62	4.4
S20	yeast	31	2.2
S20	sucrose	57	1.8
S20	yeast	33	1
S20	sucrose	53	2.2
S20	yeast	20	0.7
S20	sucrose	24	2.1
S20	yeast	23	0.6
S20	sucrose	75	3.8
S20	yeast	72	1.8
S20	yeast	86	3.8
S20	sucrose	96	7.5
S20	yeast	74	2.8
S20	sucrose	63	9
S20	yeast	24	0.7
S20	sucrose	23	3.2
S20	yeast	89	5.8
S20	sucrose	55	5.6
S20	yeast	75	3
S20	sucrose	78	7.3
S20	yeast	19	4.4
S20	sucrose	3	0.8
S10	sucrose	100	2.7
S10	yeast	65	1.2
S10	sucrose	30	2.8
S10	yeast	22	0.4
S10	sucrose	21	3.2
S10	yeast	27	1.8
S10	sucrose	27	2.2
S10	yeast	10	1.3
S10	sucrose	42	1.6
S10	yeast	37	0.4
S10	sucrose	59	3.8
S10	yeast	44	1.3
S1	sucrose	10	1.3
S1	yeast	16	1.8
S1	sucrose	150	2.4
S1	yeast	113	2.2
S1	sucrose	223	2.4
S1	yeast	147	2.2
S1	sucrose	14	1.6
S1	yeast	18	0.8
S1	sucrose	6	0.4
S1	yeast	7	0.6
water	sucrose	46	1.2
water	yeast	52	1.8
water	sucrose	53	1.2
water	yeast	58	4.7
water	sucrose	129	1
water	yeast	180	2.2
water	sucrose	95	2
water	yeast	103	2.4
water	sucrose	33	1
water	yeast	42	1.7
water	yeast	14	4
water	sucrose	18	2.4
water	yeast	72	3
water	sucrose	47	1.6
water	yeast	20	1.8
water	sucrose	24	1
water	yeast	40	2.3
water	sucrose	33	1
water	yeast	16	1.2
water	sucrose	5	1.4

## Sheet: Fig3 - Fig. Supp. 1
Diet	Volume	mass
S2	0.0451334	0.902668
S2	0.0567659	1.13532
S2	0.0391185	0.78237
S2	0.0815786	1.63157
S2	0.0957021	1.91404
S2	0.0523575	1.04715
S20	0.120264	24.0528
S20	0.0879296	17.5859
S20	0.135526	27.1052
S20	0.131049	26.2097
