# Supplementary material for: Behavioral dissection of hunger states in Drosophila
Source: eLife. 2023 Jun 16;12:RP84537. doi: 10.7554/eLife.84537 (PMC10328523; doi:10.7554/eLife.84537)
Supplement: Figure 4—source data 1. [file elife-84537-fig4-data1.xls]

## Sheet: Fig4A_C
Treatment	FoodChoice	Well	Events	MedDuration
starved	S20	sucrose	63	7.4
A_SY10	S20	sucrose	19	9
starved	S20	sucrose	114	6.6
starved	S20	sucrose	72	8.3
A_SY10	S20	sucrose	57	3.4
A_SY10	S20	sucrose	96	5.2
starved	S20	sucrose	67	9
A_SY10	S20	sucrose	35	3.8
starved	S20	sucrose	78	7.2
starved	S20	sucrose	83	6.8
A_SY10	S20	sucrose	45	2.8
A_SY10	S20	sucrose	42	5.1
A_SY10	S2	sucrose	113	7.4
starved	S2	sucrose	15	3.4
A_SY10	S2	sucrose	7	4.8
starved	S2	sucrose	22	5.2
starved	S2	sucrose	26	3.4
A_SY10	S2	sucrose	100	4.5
A_SY10	S2	sucrose	38	1.4
A_SY10	S2	sucrose	39	3.8
starved	S2	sucrose	74	5.9
A_SY10	S2	sucrose	16	4.6
starved	S2	sucrose	22	5.8
A_SY10	S2	sucrose	28	4
A_SY10	S2	sucrose	55	2.4
starved	S2	sucrose	20	4.3
starved	S2	sucrose	31	3.6
starved	S20	sucrose	145	5.2
A_SY10	S20	sucrose	106	8.5
starved	S20	sucrose	75	6
starved	S20	sucrose	33	6.4
A_SY10	S20	sucrose	36	8
A_SY10	S20	sucrose	75	13.4
A_SY10	S2	sucrose	47	7.4
A_SY10	S2	sucrose	40	6.5
A_SY10	S2	sucrose	8	2.4
starved	S2	sucrose	110	4.7
starved	S20	sucrose	185	3.6
A_SY10	S20	sucrose	76	5.6
starved	S20	sucrose	58	8.4
starved	S20	sucrose	65	9.6
A_SY10	S20	sucrose	78	5.2
A_SY10	S20	sucrose	65	5.8
A_SY10	S20	sucrose	73	4.6
starved	S20	sucrose	2	12.4
A_SY10	S20	sucrose	92	5.4
A_SY10	S20	sucrose	42	6
starved	S20	sucrose	39	4.2
starved	S2	sucrose	19	1.8
A_SY10	S2	sucrose	8	4.9
starved	S2	sucrose	5	3.8
A_SY10	S2	sucrose	14	4.3
starved	S20	sucrose	42	3.6
A_SY10	S20	sucrose	102	2.2
starved	S20	sucrose	28	2.9
A_SY10	S20	sucrose	40	4.2
A_SY10	S20	sucrose	102	2.9
starved	S2	sucrose	7	0.6
starved	S2	sucrose	24	3.3
A_SY10	S2	sucrose	23	4.2
starved	S20	sucrose	20	3.6
A_SY10	S20	sucrose	102	3.4
starved	S20	sucrose	47	6.4
starved	S20	sucrose	4	2.3
A_SY10	S20	sucrose	50	4.1
A_SY10	S20	sucrose	26	4.2
A_SY10	S2	sucrose	52	1.6
starved	S2	sucrose	4	10
A_SY10	S20	sucrose	4	4.3
A_SY10	S20	sucrose	14	9.4
A_SY10	S20	sucrose	14	4.5
A_SY10	S20	sucrose	107	3.4
A_SY10	S20	sucrose	12	6
A_SY10	S2	sucrose	37	7.8
A_SY10	S2	sucrose	38	3.7
A_SY10	S2	sucrose	34	4.5
starved	S2	sucrose	22	1.6
A_SY10	S2	sucrose	28	6.4
A_SY10	S2	sucrose	14	5.2
A_SY10	S2	sucrose	69	8.4
starved	S2	sucrose	14	7.6
starved	S2	sucrose	26	4.2
A_SY10	S20	sucrose	45	5.8
starved	S20	sucrose	44	4.8
A_SY10	S20	sucrose	6	5.6
A_SY10	S20	sucrose	98	7.6
starved	S20	sucrose	62	7.7
starved	S20	sucrose	20	6.8
starved	S20	sucrose	7	14.6
A_SY10	S20	sucrose	53	9
starved	S20	sucrose	72	6.6
starved	S20	sucrose	5	6.6
A_SY10	S20	sucrose	33	8.4
A_SY10	S20	sucrose	29	4.4
starved	S2	sucrose	23	2.4
A_SY10	S2	sucrose	27	2.6
starved	S2	sucrose	10	3.1
starved	S2	sucrose	2	5.7
A_SY10	S2	sucrose	11	1.6
A_SY10	S2	sucrose	14	3.4
A_SY10	S20	sucrose	21	5.2
starved	S20	sucrose	45	6.2
A_SY10	S20	sucrose	72	8.5
A_SY10	S20	sucrose	30	5.9
starved	S20	sucrose	32	12.2
starved	S20	sucrose	9	9.6
A_SY10	S2	sucrose	20	5.4
starved	S2	sucrose	10	4
A_SY10	S2	sucrose	25	6.6
starved	S2	sucrose	28	4.5
starved	S2	sucrose	5	7.2
starved	S20	sucrose	16	7.6
A_SY10	S20	sucrose	4	2.7
starved	S20	sucrose	4	4.7
starved	S20	sucrose	30	4.5
A_SY10	S20	sucrose	26	4.5
A_SY10	S20	sucrose	66	5.9
starved	S2	sucrose	46	5.2
A_SY10	S2	sucrose	29	3.2
starved	S2	sucrose	25	4.4
starved	S2	sucrose	8	8.9
starved	S2	yeast	164	8.6
A_SY10	S2	yeast	71	3.2
starved	S20	yeast	105	7.2
A_SY10	S20	yeast	20	6.6
starved	S20	yeast	42	13.2
starved	S20	yeast	34	9.1
A_SY10	S20	yeast	155	6.6
A_SY10	S20	yeast	16	1.9
A_SY10	S2	yeast	41	6.4
starved	S2	yeast	81	5
A_SY10	S2	yeast	127	7.6
A_SY10	S2	yeast	120	3.9
starved	S2	yeast	45	4
starved	S2	yeast	51	10
starved	S20	yeast	36	3.5
A_SY10	S20	yeast	55	3.6
starved	S20	yeast	32	5.8
starved	S20	yeast	33	7.4
A_SY10	S20	yeast	84	4.4
A_SY10	S20	yeast	57	1.4
A_SY10	S20	yeast	31	3.6
starved	S20	yeast	105	4.4
A_SY10	S20	yeast	59	4.2
A_SY10	S20	yeast	85	7.4
starved	S20	yeast	94	5.2
starved	S20	yeast	112	5.6
starved	S2	yeast	33	13.6
A_SY10	S2	yeast	98	4.7
starved	S2	yeast	31	4
starved	S2	yeast	74	2.5
A_SY10	S2	yeast	97	2.8
A_SY10	S20	yeast	67	4.6
starved	S20	yeast	27	6.6
A_SY10	S20	yeast	51	3
A_SY10	S20	yeast	63	7
starved	S20	yeast	78	7.8
starved	S20	yeast	49	5.2
starved	S20	yeast	64	8.7
A_SY10	S20	yeast	55	6.2
starved	S20	yeast	138	7.4
starved	S20	yeast	101	7.2
A_SY10	S20	yeast	43	3.8
A_SY10	S20	yeast	85	5.8
starved	S20	yeast	89	10.8
A_SY10	S20	yeast	48	6.2
starved	S20	yeast	92	8.5
starved	S20	yeast	137	9.6
A_SY10	S20	yeast	89	4.6
A_SY10	S20	yeast	57	7.4
A_SY10	S2	yeast	91	6.2
starved	S2	yeast	19	11.6
A_SY10	S2	yeast	16	5.9
starved	S2	yeast	42	8.7
starved	S2	yeast	73	2.4
A_SY10	S2	yeast	82	3.9
A_SY10	S2	yeast	49	5
A_SY10	S2	yeast	18	4.8
starved	S2	yeast	71	8.8
A_SY10	S2	yeast	38	6.8
starved	S2	yeast	76	6.2
A_SY10	S2	yeast	28	12.5
A_SY10	S2	yeast	61	10
starved	S2	yeast	103	9.4
starved	S2	yeast	89	6.2
starved	S20	yeast	92	12
A_SY10	S20	yeast	187	5.6
starved	S20	yeast	62	5.3
starved	S20	yeast	75	7.4
A_SY10	S20	yeast	84	5.4
A_SY10	S20	yeast	132	7.7
A_SY10	S2	yeast	73	2.8
A_SY10	S2	yeast	53	10.8
A_SY10	S2	yeast	60	8.5
starved	S2	yeast	100	8.3
starved	S20	yeast	133	5.2
A_SY10	S20	yeast	80	5.8
starved	S20	yeast	89	13
starved	S20	yeast	111	12
A_SY10	S20	yeast	122	7.8
A_SY10	S20	yeast	75	11.8
A_SY10	S20	yeast	132	7
starved	S20	yeast	14	8.9
A_SY10	S20	yeast	66	1.2
A_SY10	S20	yeast	20	1.6
starved	S20	yeast	60	7.2
starved	S2	yeast	29	3.8
A_SY10	S2	yeast	30	11.7
starved	S2	yeast	48	6
A_SY10	S2	yeast	19	7.4
starved	S20	yeast	52	3.2
A_SY10	S20	yeast	55	0.8
starved	S20	yeast	46	1.2
A_SY10	S20	yeast	86	5.5
A_SY10	S20	yeast	71	0.8
starved	S2	yeast	11	16.4
starved	S2	yeast	46	7.8
A_SY10	S2	yeast	49	3.2
starved	S20	yeast	36	4.8
A_SY10	S20	yeast	52	2.4
starved	S20	yeast	54	2.6
starved	S20	yeast	54	7.1
A_SY10	S20	yeast	82	4.8
A_SY10	S20	yeast	30	0.8
A_SY10	S2	yeast	37	3.4
starved	S2	yeast	42	7
A_SY10	S20	yeast	19	3
A_SY10	S20	yeast	60	6.7
A_SY10	S20	yeast	12	3.1
A_SY10	S20	yeast	123	2
A_SY10	S20	yeast	55	5.4
A_SY10	S2	yeast	60	6.2
A_SY10	S2	yeast	31	1.8
A_SY10	S2	yeast	57	6
starved	S2	yeast	41	3.4
A_SY10	S2	yeast	36	10.5
A_SY10	S2	yeast	28	9.2
A_SY10	S2	yeast	71	4.8
starved	S2	yeast	37	6.8
starved	S2	yeast	26	6.5
A_SY10	S20	yeast	74	4
starved	S20	yeast	52	5.3
A_SY10	S20	yeast	12	8.7
A_SY10	S20	yeast	142	4.7
starved	S20	yeast	68	7.5
starved	S20	yeast	97	4.6
starved	S20	yeast	64	10.1
A_SY10	S20	yeast	56	6.1
starved	S20	yeast	111	7.6
starved	S20	yeast	81	8.8
A_SY10	S20	yeast	52	2.6
A_SY10	S20	yeast	50	6.8
starved	S2	yeast	74	6.2
A_SY10	S2	yeast	63	9.2
starved	S2	yeast	50	7.9
starved	S2	yeast	49	8.6
A_SY10	S2	yeast	50	9.3
A_SY10	S2	yeast	27	5.4
A_SY10	S20	yeast	29	1.8
starved	S20	yeast	56	5.5
A_SY10	S20	yeast	52	2
A_SY10	S20	yeast	22	2.1
starved	S20	yeast	31	7.6
starved	S20	yeast	69	4
A_SY10	S2	yeast	33	3
starved	S2	yeast	44	7.9
A_SY10	S2	yeast	34	8.8
starved	S2	yeast	38	9.4
starved	S2	yeast	41	5.2
starved	S20	yeast	47	5.6
A_SY10	S20	yeast	10	1.1
starved	S20	yeast	38	7.8
starved	S20	yeast	69	3.4
A_SY10	S20	yeast	20	2
A_SY10	S20	yeast	85	3.2
starved	S2	yeast	65	2.2
A_SY10	S2	yeast	20	4.3
starved	S2	yeast	42	4.4
starved	S2	yeast	45	8.4

## Sheet: Fig4B
TreatmentA	Well	FoodChoice	Events
48hr	sucrose	S2	19
24hr	sucrose	S2	4
24hr	sucrose	S2	11
48hr	sucrose	S20	12
24hr	sucrose	S20	4
48hr	sucrose	S20	82
48hr	sucrose	S20	35
24hr	sucrose	S20	74
24hr	sucrose	S20	29
24hr	sucrose	S2	5
48hr	sucrose	S20	9
48hr	sucrose	S20	14
48hr	sucrose	S20	9
24hr	sucrose	S20	8
24hr	sucrose	S20	18
24hr	sucrose	S2	14
48hr	sucrose	S2	7
24hr	sucrose	S2	21
48hr	sucrose	S2	59
24hr	sucrose	S20	17
48hr	sucrose	S20	16
24hr	sucrose	S20	107
48hr	sucrose	S20	11
24hr	sucrose	S2	13
24hr	sucrose	S2	1
48hr	sucrose	S2	2
24hr	sucrose	S20	2
48hr	sucrose	S20	13
24hr	sucrose	S20	15
24hr	sucrose	S20	24
48hr	sucrose	S20	18
48hr	sucrose	S20	3
24hr	sucrose	S2	6
48hr	sucrose	S2	14
24hr	sucrose	S2	2
24hr	sucrose	S2	8
24hr	sucrose	S20	2
48hr	sucrose	S20	6
48hr	sucrose	S20	11
24hr	sucrose	S20	6
24hr	sucrose	S20	2
24hr	sucrose	S20	3
48hr	sucrose	S20	9
48hr	sucrose	S20	10
24hr	sucrose	S20	7
24hr	sucrose	S20	2
48hr	sucrose	S2	5
24hr	sucrose	S2	5
24hr	sucrose	S2	8
48hr	sucrose	S2	6
48hr	sucrose	S2	6
24hr	sucrose	S20	3
48hr	sucrose	S20	16
48hr	sucrose	S20	26
48hr	sucrose	S2	6
24hr	sucrose	S2	13
48hr	yeast	S2	346
24hr	yeast	S2	46
24hr	yeast	S2	36
48hr	yeast	S20	197
24hr	yeast	S20	51
48hr	yeast	S20	121
48hr	yeast	S20	296
24hr	yeast	S20	91
24hr	yeast	S20	65
24hr	yeast	S2	49
48hr	yeast	S20	38
48hr	yeast	S20	140
48hr	yeast	S20	129
24hr	yeast	S20	76
24hr	yeast	S20	38
24hr	yeast	S2	123
48hr	yeast	S2	74
24hr	yeast	S2	70
48hr	yeast	S2	93
24hr	yeast	S20	40
48hr	yeast	S20	61
24hr	yeast	S20	152
48hr	yeast	S20	507
24hr	yeast	S2	107
24hr	yeast	S2	81
48hr	yeast	S2	456
24hr	yeast	S20	28
48hr	yeast	S20	28
24hr	yeast	S20	30
24hr	yeast	S20	55
48hr	yeast	S20	41
48hr	yeast	S20	32
24hr	yeast	S2	42
48hr	yeast	S2	46
24hr	yeast	S2	35
24hr	yeast	S2	71
24hr	yeast	S20	38
48hr	yeast	S20	23
48hr	yeast	S20	82
24hr	yeast	S20	28
24hr	yeast	S20	41
24hr	yeast	S20	30
48hr	yeast	S20	35
48hr	yeast	S20	73
24hr	yeast	S20	11
24hr	yeast	S20	44
48hr	yeast	S2	236
24hr	yeast	S2	412
24hr	yeast	S2	63
48hr	yeast	S2	276
48hr	yeast	S2	254
24hr	yeast	S20	83
48hr	yeast	S20	42
48hr	yeast	S20	55
48hr	yeast	S2	79
24hr	yeast	S2	35

## Sheet: Fig4D
Treatment	FoodChoice	Well	TFLicks	TFDuration
starved	S2	sucrose	10.1388	0.778913
starved	S2	sucrose	7.46716	0.80618
starved	S2	sucrose	6.31167	0.199157
starved	S20	sucrose	9.24243	1.22746
starved	S20	sucrose	7.30011	1.0086
starved	S20	sucrose	8.88926	0.931408
starved	S20	sucrose	10.0956	1.18929
starved	S20	sucrose	8.5564	1.10693
starved	S20	sucrose	7.57814	1.14226
starved	S2	sucrose	7.84879	0.871573
starved	S20	sucrose	7.66121	0.904295
starved	S20	sucrose	8.08648	1.30627
starved	S20	sucrose	9.63136	0.860005
starved	S20	sucrose	8.26709	0.696793
starved	S20	sucrose	7.20376	0.969002
starved	S2	sucrose	9.29237	1.00062
starved	S2	sucrose	7.97054	0.802285
starved	S2	sucrose	8.03685	0.675167
starved	S2	sucrose	8.50404	0.964108
starved	S20	sucrose	6.60654	1.35524
starved	S20	sucrose	8.50242	1.21748
starved	S20	sucrose	10.0773	1.09172
starved	S20	sucrose	9.95114	0.83018
starved	S2	sucrose	8.37427	0.943723
starved	S2	sucrose	8.69164	0.732394
starved	S2	sucrose	8.95787	0.869232
starved	S20	sucrose	6.7991	1.20952
starved	S20	sucrose	5.68428	0.910542
starved	S20	sucrose	5.42475	0.517636
starved	S20	sucrose	7.56605	0.88129
starved	S20	sucrose	6.19724	0.770033
starved	S20	sucrose	6.65286	1.34766
starved	S2	sucrose	6.21502	0.531479
starved	S2	sucrose	6.92971	0.813867
starved	S2	sucrose	6.98318	0.748188
starved	S2	sucrose	8.37512	0.90309
starved	S20	sucrose	6.50812	1.02119
starved	S20	sucrose	6.46784	0.847161
starved	S20	sucrose	8.29438	1.04067
starved	S20	sucrose	5.96497	0.79472
starved	S20	sucrose	7.8202	0.518514
starved	S20	sucrose	6.52888	0.892095
starved	S20	sucrose	6.28062	0.938964
starved	S20	sucrose	8.20579	1.20412
starved	S20	sucrose	5.26601	1.27284
starved	S20	sucrose	6.6418	0.380211
starved	S2	sucrose	9.14397	0.873902
starved	S2	sucrose	9.52496	0.973128
starved	S2	sucrose	7.48212	0.709694
starved	S2	sucrose	8.70797	0.853293
starved	S2	sucrose	8.13335	0.863323
starved	S20	sucrose	8.05461	0.94776
starved	S20	sucrose	5.12707	0.855822
starved	S20	sucrose	7.18967	1.03404
starved	S2	sucrose	8.41233	1.20952
starved	S2	sucrose	6.09494	0.624837
sated	S20	sucrose	4.01939	0.586868
sated	S20	sucrose	6.58212	0.53204
sated	S20	sucrose	4.90535	0.535494
sated	S20	sucrose	6.66809	0.536954
sated	S20	sucrose	4.68556	0.609239
sated	S20	sucrose	2.27951	0.778151
sated	S2	sucrose	5.97085	0.576792
sated	S2	sucrose	6.05255	0.702363
sated	S2	sucrose	6.46784	0.996558
sated	S2	sucrose	8.34947	0.852261
sated	S2	sucrose	6.75005	0.689252
sated	S20	sucrose	4.42384	0.870905
sated	S20	sucrose	3.92775	0.845098
sated	S20	sucrose	4.46373	0.706065
sated	S20	sucrose	4.28775	0.467361
sated	S20	sucrose	6.54231	0.87735
sated	S2	sucrose	4.25892	0.20412
sated	S2	sucrose	7.62707	1.01703
sated	S2	sucrose	5.18543	0.4843
sated	S2	sucrose	4.5431	0.625998
sated	S2	sucrose	4.11953	-0.221849
sated	S20	sucrose	3.71269	0.871516
sated	S20	sucrose	5.09713	-0.09691
sated	S20	sucrose	4.73579	0.811039
sated	S20	sucrose	4.70248	0.760646
sated	S20	sucrose	5.95789	0.681241
sated	S2	sucrose	6.24294	1.11926
sated	S2	sucrose	5.45888	0.735792
sated	S2	sucrose	6.01384	0.652469
sated	S2	sucrose	5.9942	0.459392
sated	S2	sucrose	4.2028	0.819544
sated	S20	sucrose	3.99216	0.675167
sated	S20	sucrose	5.96144	0.962419
sated	S20	sucrose	8.13242	0.810477
sated	S20	sucrose	4.49157	0.20412
sated	S20	sucrose	3.55099	0.755875
sated	S2	sucrose	5.29824	0.48337
sated	S2	sucrose	5.99652	0.721536
sated	S2	sucrose	4.93473	0.447158
sated	S2	sucrose	4.89685	1.0686
sated	S2	sucrose	3.49379	0.336306
sated	S2	sucrose	4.11595	0.457377
sated	S20	sucrose	6.51988	0.972486
sated	S20	sucrose	3.89432	0.549003
sated	S20	sucrose	5.8385	0.713046
sated	S20	sucrose	4.86677	0.520227
sated	S20	sucrose	4.28775	0.642815
sated	S2	sucrose	6.17187	0.546202
sated	S2	sucrose	6.78633	0.846867
sated	S2	sucrose	8.60625	0.518514
sated	S20	sucrose	5.56051	0.90309
sated	S20	sucrose	5.63043	0.939903
sated	S20	sucrose	2.73556	1.24613
sated	S20	sucrose	3.64748	0.825148
sated	S20	sucrose	5.41217	0.507156
sated	S2	sucrose	6.0469	0.631444
sated	S2	sucrose	7.75991	0.669007
sated	S2	sucrose	6.7419	0.773055
sated	S2	sucrose	6.42303	0.568202
sated	S20	sucrose	3.00922	0.913814
sated	S20	sucrose	3.97635	0.609239
sated	S20	sucrose	6.08276	0.878367
sated	S20	sucrose	5.42475	0.713426
sated	S2	sucrose	4.61598	0.656418
sated	S2	sucrose	4.39468	0.539912
sated	S2	sucrose	6.47706	0.465563
sated	S2	sucrose	4.54043	0.383489
sated	S2	sucrose	4.5431	0.653213
sated	S2	sucrose	7.54809	0.611133
sated	S20	sucrose	6.36178	0.82823
sated	S20	sucrose	4.87973	0.986985
sated	S20	sucrose	8.2337	1.04873
sated	S20	sucrose	3.94007	0.768391
sated	S2	sucrose	6.22954	0.542687
sated	S2	sucrose	2.44949	0.342423
sated	S2	sucrose	5.78631	0.503207
sated	S2	sucrose	4.73107	0.477121
sated	S2	sucrose	3.68802	-0.221849
sated	S2	sucrose	4.37988	0.719331
sated	S20	sucrose	7.57124	0.889154
sated	S20	sucrose	4.69525	0.799341
sated	S20	sucrose	6.26441	1.27416
sated	S20	sucrose	7.87503	1.24902
sated	S20	sucrose	6.2987	1.17725
sated	S20	sucrose	7.2071	0.79796
sated	S2	sucrose	5.43412	1.19312
sated	S2	sucrose	6.82441	0.643453
sated	S2	sucrose	6.11909	0.748918
sated	S20	sucrose	6.66809	0.91293
sated	S20	sucrose	7.27622	0.594147
sated	S20	sucrose	4.23936	0.519525
sated	S20	sucrose	5.83347	0.765044
sated	S20	sucrose	6.00116	0.695297
sated	S2	sucrose	3.94007	0.623249
sated	S2	sucrose	4.08697	0.306012
sated	S2	sucrose	5.30997	0.428516
sated	S2	sucrose	4.69767	0.359625
sated	S2	sucrose	5.75901	0.484774
sated	S20	sucrose	5.65685	0.489356
sated	S20	sucrose	3.96035	1.07918
sated	S20	sucrose	4.45244	0.555391
sated	S20	sucrose	5.01196	0.771801
sated	S20	sucrose	4.95746	0.612391
sated	S2	sucrose	6.73209	0.39211
sated	S2	sucrose	5.26087	0.934498
sated	S2	sucrose	8.73923	0.109144
sated	S2	sucrose	6.19303	0.642177
sated	S2	sucrose	6.57422	0.600081
sated	S20	sucrose	4.14082	0.390108
sated	S20	sucrose	3.69794	0.855317
sated	S20	sucrose	4.21287	0.967548
sated	S20	sucrose	6.17824	0.643453
sated	S20	sucrose	4.85807	0.457377
sated	S2	sucrose	5.84978	0.663936
sated	S2	sucrose	4.40349	0.924279
sated	S2	sucrose	5.02777	0.716003
sated	S2	sucrose	4.78446	0.584331
sated	S2	sucrose	6.04577	0.963788
sated	S20	sucrose	7.68611	0.659599
sated	S20	sucrose	3.08007	0.342423
sated	S20	sucrose	4.8537	0.993835
sated	S20	sucrose	5.56487	0.30963
sated	S20	sucrose	4.85807	0.763428
sated	S20	sucrose	4.40641	0.725912
sated	S2	sucrose	8.94811	0.764425
sated	S2	sucrose	6.35594	0.821186
sated	S2	sucrose	5.68291	0.290035
sated	S2	sucrose	4.55637	0.531479
sated	S2	sucrose	6.54053	0.247155
sated	S20	sucrose	4.59551	0.643453
sated	S20	sucrose	4.55637	0.953252
sated	S20	sucrose	6.02187	0.70927
sated	S20	sucrose	4.75683	0.574031
sated	S20	sucrose	7.59075	1.03208
sated	S20	sucrose	3.65774	0.819544
sated	S2	sucrose	5.68835	0.662758
sated	S2	sucrose	4.34981	0.612784
sated	S2	sucrose	6.21606	0.319915
sated	S2	sucrose	4.25243	0.278754
sated	S2	sucrose	4.42673	0.270361
sated	S2	sucrose	7.31804	0.389166
sated	S20	sucrose	4.43821	0.90309
sated	S20	sucrose	5.72068	0.851258
sated	S20	sucrose	5.30662	0.910269
sated	S20	sucrose	5.71934	0.91698
sated	S20	sucrose	5.56196	0.711526
sated	S20	sucrose	7.70858	1.02102
sated	S2	sucrose	7.75134	0.468658
sated	S2	sucrose	5.86594	0.502882
sated	S2	sucrose	4.18926	0.755875
sated	S2	sucrose	6.21918	0.703905
sated	S2	sucrose	7.48093	0.369746
sated	S2	sucrose	5.69378	0.459392
sated	S20	sucrose	6.16655	0.556303
sated	S20	sucrose	4.97785	1.00753
sated	S20	sucrose	5.83473	0.548512
sated	S20	sucrose	6.82362	0.443937
sated	S20	sucrose	6.28566	0.588637
sated	S20	sucrose	5.53415	1.02001
sated	S2	sucrose	6.50812	0.71265
sated	S2	sucrose	4.94717	0.0791812
sated	S2	sucrose	6.96475	0.591065
sated	S2	sucrose	6.12454	0.260805
sated	S2	sucrose	7.01887	0.69897
sated	S2	sucrose	4.66354	0.483752
sated	S2	sucrose	6.26746	0.590409
sated	S2	sucrose	5.4558	0.799103
sated	S2	sucrose	5.06473	0.354931
starved	S2	sucrose	7.02249	0
starved	S2	sucrose	6.96549	0.471292
starved	S2	sucrose	6.3354	0.564271
sated	S20	sucrose	5.46041	0.770852
sated	S20	sucrose	8.00585	1.00021
sated	S20	sucrose	6.83304	0.526809
starved	S20	sucrose	4.95541	1.10037
starved	S20	sucrose	6.24089	1.10037
starved	S20	sucrose	6.80307	1.51288
sated	Arabinose	sucrose	5.32824	0.410701
sated	Arabinose	sucrose	5.68019	0.381931
sated	Arabinose	sucrose	5.88444	0.693727
starved	Arabinose	sucrose	4.88188	0.755137
starved	Arabinose	sucrose	5.75246	0.706224
starved	Arabinose	sucrose	4.74049	0.556303
sated	S2	sucrose	5.79789	0.479527
sated	S2	sucrose	6.66218	0.366423
sated	S2	sucrose	6.6048	0.544068
starved	S2	sucrose	6.8742	0.591365
starved	S20	sucrose	6.85177	0.981517
starved	S20	sucrose	7.05617	0.948361
starved	S20	sucrose	5.66375	0.803457
sated	S20	sucrose	3.50545	0.623249
sated	S20	sucrose	7.39651	0.582937
sated	S20	sucrose	3.93187	1.00663
starved	Arabinose	sucrose	6.10596	0.860162
starved	Arabinose	sucrose	5.99768	0.87326
starved	Arabinose	sucrose	5.87706	0.433147
sated	Arabinose	sucrose	7.47135	0.847847
sated	Arabinose	sucrose	7.37977	0.938686
sated	Arabinose	sucrose	6.92745	0.623249
starved	S2	sucrose	7.62876	0.591065
starved	S2	sucrose	7.72599	0.991226
starved	S2	sucrose	8.54681	0.956048
sated	S2	sucrose	7.56027	0.763226
sated	S2	sucrose	6.47061	0.683819
sated	S2	sucrose	5.40744	1.0569
starved	Arabinose	sucrose	5.18901	1.01384
starved	Arabinose	sucrose	5.36908	0.508395
sated	Arabinose	sucrose	4.25892	0.896526
sated	Arabinose	sucrose	5.20858	0.69897
sated	Arabinose	sucrose	2.91295	0.607812
sated	S2	sucrose	6.11909	0.374816
sated	S2	sucrose	6.97287	0.206474
sated	S2	sucrose	6.97803	-0.09691
starved	S2	sucrose	7.3295	0.745075
starved	S2	sucrose	6.07274	0.643453
starved	S2	sucrose	5.26943	0.442359
sated	S20	sucrose	6.54231	0.424295
sated	S20	sucrose	5.72201	0.641581
sated	S20	sucrose	6.06379	0.614649
starved	S20	sucrose	5.08956	1.09342
starved	S20	sucrose	7.82125	0.721427
starved	S20	sucrose	4.73579	0.840013
sated	Arabinose	sucrose	7.85602	0.908729
sated	Arabinose	sucrose	4.97379	0.792392
sated	Arabinose	sucrose	4.95951	0.659311
starved	Arabinose	sucrose	4.61598	0.937779
starved	Arabinose	sucrose	6.16441	0.894562
starved	Arabinose	sucrose	5.4696	0.687761
sated	S2	sucrose	6.19829	0.528274
sated	S2	sucrose	5.00798	0.786515
sated	S2	sucrose	6.78953	0.298307
starved	S2	sucrose	6.19724	0.579784
starved	S2	sucrose	6.92444	0.635986
starved	S2	sucrose	6.20038	0.772688
starved	S20	sucrose	7.73248	0.771465
starved	S20	sucrose	6.36081	0.898999
starved	S20	sucrose	6.43901	0.507256
sated	S20	sucrose	6.25012	0.59712
sated	S20	sucrose	3.58402	0.468769
sated	S20	sucrose	6.19829	0.587337
starved	Arabinose	sucrose	4.95541	1.02082
starved	Arabinose	sucrose	6.59698	0.985765
starved	Arabinose	sucrose	5.76294	0.93044
sated	Arabinose	sucrose	5.91487	0.945833
sated	Arabinose	sucrose	4.7753	0.854146
sated	Arabinose	sucrose	4.81834	0.728933
starved	S20	sucrose	9.32059	0.851258
starved	S20	sucrose	10.5058	0.995008
sated	S20	sucrose	6.20038	0.636967
sated	S20	sucrose	5.42318	1.13354
sated	S20	sucrose	4.51891	0.82823
starved	Arabinose	sucrose	5.67882	0.93609
starved	Arabinose	sucrose	8.89282	1.1851
starved	Arabinose	sucrose	5.1215	0.875704
sated	Arabinose	sucrose	4.37092	0.885864
sated	Arabinose	sucrose	5.63323	0.555031
sated	Arabinose	sucrose	4.47493	1.04382
starved	S20	sucrose	9.733	0.890501
sated	S20	sucrose	6.72717	0.869849
starved	S20	sucrose	8.06607	0.949818
starved	S20	sucrose	5.17824	1.10485
sated	S20	sucrose	7.16329	0.656081
sated	S20	sucrose	6.31564	0.805189
starved	S20	sucrose	9.04662	1.09882
sated	S20	sucrose	4.23608	0.649057
starved	S20	sucrose	6.33048	1.00067
starved	S20	sucrose	6.98391	1.00052
sated	S20	sucrose	8.91584	0.721169
sated	S20	sucrose	6.93571	0.754421
sated	S2	sucrose	6.64606	1.05731
starved	S2	sucrose	7.58617	0.541579
sated	S2	sucrose	5.31996	0.623249
starved	S2	sucrose	6.31663	0.792392
starved	S2	sucrose	5.48784	0.611151
sated	S2	sucrose	6.31564	1.00251
sated	S2	sucrose	7.67783	0.408775
sated	S2	sucrose	5.17824	0.81068
starved	S2	sucrose	5.03953	1.06859
sated	S2	sucrose	7.2244	0.62711
starved	S2	sucrose	6.80307	0.867092
sated	S2	sucrose	8.31968	0.679947
sated	S2	sucrose	7.16329	0.583096
starved	S2	sucrose	7.88984	0.729974
starved	S2	sucrose	6.96992	0.583455
starved	S20	sucrose	7.65564	1.06647
sated	S20	sucrose	5.99304	1.24663
starved	S20	sucrose	5.70996	0.996628
starved	S20	sucrose	6.57334	0.726999
sated	S20	sucrose	6.58125	1.02188
sated	S20	sucrose	6.04124	1.30963
sated	S2	sucrose	6.08498	0.913814
sated	S2	sucrose	7.01526	0.868938
sated	S2	sucrose	7.60386	0.458638
starved	S2	sucrose	6.2977	0.746917
starved	S20	sucrose	7.30525	0.693584
sated	S20	sucrose	6.36856	0.941616
starved	S20	sucrose	9.38416	0.933103
starved	S20	sucrose	8.78604	1.08306
sated	S20	sucrose	6.12889	0.80496
sated	S20	sucrose	7.39218	1.01407
sated	S20	sucrose	8.78346	0.824919
starved	S20	sucrose	6.52798	1.09342
sated	S20	sucrose	8.15049	0.958003
sated	S20	sucrose	9.67969	0.816083
starved	S20	sucrose	7.41497	0.906694
starved	S2	sucrose	7.2297	0.287094
sated	S2	sucrose	8.27504	0.683497
starved	S2	sucrose	5.67061	0.55145
sated	S2	sucrose	5.67472	0.614294
starved	S20	sucrose	7.28399	0.679947
sated	S20	sucrose	7.03544	0.462104
starved	S20	sucrose	7.84569	0.810521
sated	S20	sucrose	6.42114	0.678973
sated	S20	sucrose	5.28135	0.923061
starved	S2	sucrose	7.76045	0.171935
starved	S2	sucrose	6.48349	0.537819
sated	S2	sucrose	8.26576	0.682812
starved	S20	sucrose	6.59785	0.546543
sated	S20	sucrose	7.83324	0.794857
starved	S20	sucrose	9.21028	0.798607
starved	S20	sucrose	8.42406	0.40654
sated	S20	sucrose	9.42444	0.707911
sated	S20	sucrose	9.79876	0.662758
sated	S2	sucrose	6.58212	0.647232
starved	S2	sucrose	7.80237	0.959041
sated	S20	sucrose	8.07606	0.822822
sated	S20	sucrose	9.14822	0.954243
sated	S20	sucrose	6.27455	0.69146
sated	S20	sucrose	7.27492	0.594692
sated	S20	sucrose	7.43877	0.805048
sated	S2	sucrose	8.39125	0.938303
sated	S2	sucrose	8.22607	0.688326
sated	S2	sucrose	7.75241	0.854127
starved	S2	sucrose	9.53795	0.322219
sated	S2	sucrose	10.0464	0.831596
sated	S2	sucrose	8.93552	0.779184
sated	S2	sucrose	8.57748	1.04128
starved	S2	sucrose	8.34775	1.038
starved	S2	sucrose	4.97583	0.755288
sated	S20	sucrose	4.9222	0.807385
starved	S20	sucrose	3.65774	0.684519
sated	S20	sucrose	7.17956	0.801632
sated	S20	sucrose	5.61919	0.911864
starved	S20	sucrose	6.47154	0.960271
starved	S20	sucrose	6.57246	0.895423
starved	S20	sucrose	5.33154	1.28652
sated	S20	sucrose	5.52676	1.12979
starved	S20	sucrose	4.20952	1.01517
starved	S20	sucrose	5.54591	0.835056
sated	S20	sucrose	7.88117	1.01092
sated	S20	sucrose	5.39793	0.766002
starved	S2	sucrose	5.54298	0.571759
sated	S2	sucrose	6.47154	0.698326
starved	S2	sucrose	5.67882	0.863323
starved	S2	sucrose	5.84853	0.755875
sated	S2	sucrose	5.96262	0.474481
sated	S2	sucrose	5.87089	0.820483
sated	S20	sucrose	7.03473	0.711204
starved	S20	sucrose	6.86185	0.876987
sated	S20	sucrose	3.75117	1.04478
sated	S20	sucrose	6.14511	0.819982
starved	S20	sucrose	6.7082	1.17026
starved	S20	sucrose	4.02707	1.17993
sated	S2	sucrose	7.20576	0.862728
starved	S2	sucrose	4.17902	0.923244
sated	S2	sucrose	6.47614	0.799065
starved	S2	sucrose	6.55655	0.753692
starved	S2	sucrose	6.78793	0.859739
starved	S20	sucrose	4.32839	0.973705
sated	S20	sucrose	6.62639	0.628389
starved	S20	sucrose	6.06603	0.70757
starved	S20	sucrose	7.01236	0.728624
sated	S20	sucrose	6.18565	0.713426
sated	S20	sucrose	6.95065	0.825682
starved	S2	sucrose	6.15264	0.820401
sated	S2	sucrose	5.60221	0.599808
starved	S2	sucrose	6.66978	0.791269
starved	S2	sucrose	6.23368	1.10721
starved	S2	sucrose	5.84603	0.532087
starved	S2	sucrose	6.35983	0.588832
starved	S2	sucrose	5.80045	0.278754
starved	S2	sucrose	6.56364	0.906181
starved	S2	sucrose	6.18248	0.759668
starved	S2	sucrose	4.42095	0.361728
starved	S2	sucrose	5.55176	0.458386
starved	S2	sucrose	5.62341	0.580088
starved	S2	sucrose	5.27795	0.500602
starved	S20	sucrose	7.2475	0.75557
starved	S20	sucrose	5.96497	0.49473
starved	S20	sucrose	6.64776	1.01651
starved	S20	sucrose	6.84633	1.06872
starved	S20	sucrose	6.0593	0.760422
starved	S20	sucrose	4.6586	0.795676
starved	S20	sucrose	5.58219	0.781037
starved	S20	sucrose	4.22618	0.691965
