# Supplementary material for: Behavioral dissection of hunger states in Drosophila
Source: eLife. 2023 Jun 16;12:RP84537. doi: 10.7554/eLife.84537 (PMC10328523; doi:10.7554/eLife.84537)
Supplement: Figure 5—source data 1. [file elife-84537-fig5-data1.xls]

## Sheet: Fig5A
Treatment	Value	FoldChange
S2	0.537748	1.0659
S2	0.482388	0.956165
S2	0.475495	0.942503
S2	0.52238	1.03544
S2	0.325246	1.15551
S2	0.237702	0.84449
S20	0.577509	1.14471
S20	0.497709	0.986533
S20	0.626485	1.24179
S20	0.409561	1.45506
S20	0.320876	1.13998

## Sheet: Fig5B
Treatment	Value	FoldChange
S2	1.24482	1.13026
S2	1.3453	1.2215
S2	0.790249	0.717524
S2	1.02505	0.93072
S2	1.15447	1.17711
S2	0.875715	0.892888
S2	0.956004	0.97475
S2	0.936879	0.955251
S20	1.6968	1.54065
S20	1.64611	1.49462
S20	1.62612	1.47648
S20	1.66182	1.69441
S20	1.53576	1.56587
S20	1.63311	1.66514

## Sheet: Fig5C
Treatment	Well	FoodChoice	Events	MedDuration
On	sucrose	S2	40	1
On	yeast	S2	43	1.8
On	sucrose	S2	64	1.3
On	yeast	S2	46	1.2
On	sucrose	S2	31	0.8
On	yeast	S2	49	1.2
On	sucrose	S2	56	0.6
On	yeast	S2	48	0.8
On	sucrose	S2	31	2.4
On	yeast	S2	28	0.8
On	sucrose	S2	12	1.3
On	yeast	S2	13	3.2
On	sucrose	S20	27	1.4
On	yeast	S20	54	1.4
On	sucrose	S20	120	2.8
On	yeast	S20	340	1.2
On	sucrose	S20	90	2
On	yeast	S20	60	0.6
On	sucrose	S20	65	2.2
On	yeast	S20	79	0.8
On	sucrose	S20	116	1.9
On	yeast	S20	72	1
On	sucrose	S20	43	3.6
On	yeast	S20	52	1.7
On	yeast	S2	19	7.8
On	sucrose	S2	5	1.8
On	yeast	S2	41	1.2
On	sucrose	S2	15	1
On	yeast	S2	51	0.6
On	sucrose	S2	33	0.6
On	yeast	S2	57	1.4
On	sucrose	S2	55	0.8
On	yeast	S20	24	0.7
On	sucrose	S20	42	2
On	yeast	S20	85	0.6
On	sucrose	S20	80	1.6
On	yeast	S20	41	0.8
On	sucrose	S20	68	2.2
On	yeast	S20	133	0.8
On	sucrose	S20	82	1.3
On	yeast	S20	94	0.8
On	sucrose	S20	41	1.6
On	yeast	S20	26	0.7
On	sucrose	S20	31	3
Off	sucrose	S2	12	1.9
Off	yeast	S2	31	3.2
Off	sucrose	S2	3	3.8
Off	yeast	S2	3	3.4
Off	sucrose	S20	10	4.2
Off	yeast	S20	32	6.5
Off	sucrose	S20	13	4.4
Off	yeast	S20	26	5.2
Off	sucrose	S20	59	3.2
Off	yeast	S20	65	1.4
Off	sucrose	S20	50	2.6
Off	yeast	S20	50	0.8
Off	sucrose	S20	10	4.2
Off	yeast	S20	12	2.5
Off	yeast	S2	9	1.6
Off	sucrose	S2	7	2.6
Off	yeast	S2	21	5
Off	sucrose	S2	13	1
Off	yeast	S2	39	6.4
Off	sucrose	S2	15	2.8
Off	yeast	S2	20	5.5
Off	sucrose	S2	8	3.1
Off	yeast	S2	24	5.4
Off	sucrose	S2	11	1.6
Off	yeast	S20	48	4.1
Off	sucrose	S20	49	2.8
Off	yeast	S20	72	1.6
Off	sucrose	S20	59	2
Off	yeast	S20	46	7.1
Off	sucrose	S20	22	3.2
Off	yeast	S20	11	6.4
Off	sucrose	S20	3	6.8
Off	yeast	S20	20	1.5
Off	sucrose	S20	5	4.8
On	sucrose	S2	36	1.1
On	yeast	S2	28	3.6
On	sucrose	S2	42	1.4
On	yeast	S2	44	1.1
On	sucrose	S2	26	0.5
On	yeast	S2	18	1.5
On	sucrose	S2	27	1.2
On	yeast	S2	48	5
On	sucrose	S2	17	0.8
On	yeast	S2	14	2.4
On	sucrose	S2	14	0.5
On	yeast	S2	28	3
On	sucrose	S20	72	1.6
On	yeast	S20	89	1.4
On	sucrose	S20	90	1.4
On	yeast	S20	99	0.6
On	sucrose	S20	121	1.4
On	yeast	S20	170	0.6
On	sucrose	S20	281	1.2
On	yeast	S20	124	1
On	sucrose	S20	54	1.1
On	yeast	S20	66	0.4
On	sucrose	S20	149	1.8
On	yeast	S20	113	1.2
On	yeast	S20	41	1.2
On	sucrose	S20	44	2.1
On	yeast	S20	109	1
On	sucrose	S20	88	1.4
On	yeast	S20	76	0.4
On	sucrose	S20	50	0.7
On	yeast	S20	89	0.8
On	sucrose	S20	71	1.4
On	yeast	S20	38	1.7
On	sucrose	S20	17	2.4
On	yeast	S20	19	0.4
On	sucrose	S20	23	2.2
Off	sucrose	S2	4	0.8
Off	yeast	S2	26	7.2
Off	sucrose	S2	15	1.6
Off	yeast	S2	28	2.4
Off	sucrose	S2	4	6.2
Off	yeast	S2	22	4.6
Off	sucrose	S2	8	1.3
Off	yeast	S2	19	2.4
Off	sucrose	S2	23	2.4
Off	yeast	S2	28	3.2
Off	sucrose	S2	5	4.2
Off	yeast	S2	15	5.6
Off	sucrose	S20	9	2.8
Off	yeast	S20	21	3.8
Off	sucrose	S20	35	2.8
Off	yeast	S20	48	2.7
Off	sucrose	S20	32	2.8
Off	yeast	S20	34	1.6
Off	sucrose	S20	19	2.8
Off	yeast	S20	36	3
Off	sucrose	S20	7	3.6
Off	yeast	S20	19	3.4
Off	sucrose	S20	4	3
Off	yeast	S20	11	3.6
Off	yeast	S2	22	2.8
Off	sucrose	S2	14	2.1
Off	yeast	S2	21	5.6
Off	sucrose	S2	10	1.9
Off	yeast	S2	25	4.2
Off	sucrose	S2	18	1.3
Off	yeast	S2	19	4.8
Off	sucrose	S2	21	2
Off	yeast	S2	16	4.8
Off	sucrose	S2	8	1.6
Off	yeast	S2	15	6
Off	sucrose	S2	3	3.2
Off	yeast	S20	26	4.1
Off	sucrose	S20	7	6
Off	yeast	S20	13	4.6
Off	sucrose	S20	8	3.4
Off	yeast	S20	34	3.4
Off	sucrose	S20	11	4.6
Off	yeast	S20	31	1.8
Off	sucrose	S20	26	1.7
Off	yeast	S20	12	4.3
Off	sucrose	S20	19	7
Off	yeast	S20	17	2.2
Off	sucrose	S20	6	2.5

## Sheet: Fig5D
Treatment	Well	FoodChoice	Events	MedDuration
On	sucrose	S2	5	1.2
On	yeast	S2	6	3.2
On	sucrose	S2	13	2.6
On	yeast	S2	14	4.6
On	sucrose	S2	14	2.1
On	yeast	S2	8	2.7
On	sucrose	S2	6	1.8
On	yeast	S2	7	7.8
On	sucrose	S20	13	3.4
On	yeast	S20	15	2.6
On	sucrose	S20	2	4.6
On	yeast	S20	8	5.2
On	sucrose	S20	95	1.4
On	yeast	S20	70	1
On	sucrose	S20	8	3.9
On	yeast	S20	13	1.6
On	sucrose	S20	6	3.5
On	yeast	S20	19	2
On	sucrose	S20	5	3.2
On	yeast	S20	12	1.8
On	yeast	S2	9	1.6
On	sucrose	S2	12	0.6
On	yeast	S2	64	2.4
On	sucrose	S2	15	3.4
On	yeast	S2	69	0.6
On	sucrose	S2	8	1.6
On	yeast	S2	68	1.7
On	sucrose	S2	59	1.4
On	yeast	S2	172	0.4
On	sucrose	S2	4	1.8
On	yeast	S2	7	4
On	sucrose	S2	3	4.2
On	yeast	S20	13	9
On	sucrose	S20	2	1.6
On	yeast	S20	24	2.3
On	sucrose	S20	10	3.3
On	yeast	S20	43	2.6
On	sucrose	S20	19	2.2
On	yeast	S20	14	2.7
On	sucrose	S20	9	2.4
On	yeast	S20	13	6.2
On	sucrose	S20	3	2.4
On	yeast	S20	4	0.8
On	sucrose	S20	2	7.1
Off	sucrose	S2	24	1.6
Off	yeast	S2	41	4.6
Off	sucrose	S2	62	4.5
Off	yeast	S2	112	7.1
Off	sucrose	S2	8	1.9
Off	yeast	S2	22	8.4
Off	sucrose	S2	17	1.4
Off	yeast	S2	42	4.8
Off	sucrose	S2	6	2.6
Off	yeast	S2	34	8.4
Off	sucrose	S2	13	1.6
Off	yeast	S2	33	5.4
Off	sucrose	S20	10	6
Off	yeast	S20	35	5.6
Off	sucrose	S20	60	3.4
Off	yeast	S20	80	0.8
Off	sucrose	S20	32	3.9
Off	yeast	S20	28	4.6
Off	sucrose	S20	26	6.4
Off	yeast	S20	33	3.6
Off	sucrose	S20	67	4
Off	yeast	S20	70	1.9
Off	sucrose	S20	43	3.4
Off	yeast	S20	36	2.5
Off	yeast	S2	33	3.4
Off	sucrose	S2	21	1.6
Off	yeast	S2	114	5.2
Off	sucrose	S2	72	1.1
Off	yeast	S2	40	4.6
Off	sucrose	S2	48	2.6
Off	yeast	S2	51	1
Off	sucrose	S2	53	2
Off	yeast	S2	22	4
Off	sucrose	S2	19	2.4
Off	yeast	S20	28	3.2
Off	sucrose	S20	28	3.5
Off	yeast	S20	97	4.2
Off	sucrose	S20	94	3
Off	yeast	S20	17	7.8
Off	sucrose	S20	8	2.4
Off	yeast	S20	67	4.2
Off	sucrose	S20	35	3.4
Off	yeast	S20	41	3.6
Off	sucrose	S20	31	3.2
On	sucrose	S2	2	4.1
On	yeast	S2	8	3.1
On	sucrose	S2	3	5.6
On	yeast	S2	14	3.9
On	sucrose	S2	56	1
On	yeast	S2	63	1
On	sucrose	S2	6	1.2
On	yeast	S2	15	3.4
On	sucrose	S2	12	1.6
On	yeast	S2	3	0.6
On	sucrose	S2	2	0.5
On	yeast	S2	11	3.4
On	sucrose	S20	7	7.4
On	yeast	S20	13	4.6
On	sucrose	S20	5	4.8
On	yeast	S20	6	1.4
On	sucrose	S20	8	1.2
On	yeast	S20	6	1
On	sucrose	S20	10	2.5
On	yeast	S20	4	1
On	sucrose	S20	49	2
On	yeast	S20	29	1
On	sucrose	S20	1	2.8
On	yeast	S20	1	1.8
On	yeast	S2	4	2
On	sucrose	S2	14	1.6
On	yeast	S2	73	1.6
On	sucrose	S2	31	1.2
On	yeast	S2	31	2.2
On	sucrose	S2	42	1.2
On	yeast	S2	5	6.6
On	sucrose	S2	9	1
On	yeast	S2	111	1.8
On	sucrose	S2	64	1.7
On	yeast	S2	18	2
On	sucrose	S2	16	1
On	yeast	S20	10	3.3
On	sucrose	S20	5	1
On	yeast	S20	21	1.2
On	sucrose	S20	17	3.2
On	yeast	S20	8	0.4
On	sucrose	S20	6	3.1
Off	sucrose	S2	30	1.3
Off	yeast	S2	38	2.6
Off	sucrose	S2	42	2
Off	yeast	S2	38	3.6
Off	sucrose	S2	29	1
Off	yeast	S2	29	3
Off	sucrose	S2	32	2.2
Off	yeast	S2	38	5.8
Off	sucrose	S2	35	1.8
Off	yeast	S2	45	3.6
Off	sucrose	S2	6	1.4
Off	yeast	S2	21	4.4
Off	sucrose	S20	40	3.6
Off	yeast	S20	34	4.9
Off	sucrose	S20	14	4
Off	yeast	S20	16	1.3
Off	sucrose	S20	60	3.2
Off	yeast	S20	61	1.8
Off	sucrose	S20	44	2.8
Off	yeast	S20	40	1.5
Off	sucrose	S20	22	5.2
Off	yeast	S20	43	5.6
Off	yeast	S2	35	5.8
Off	sucrose	S2	8	1.5
Off	yeast	S2	84	4.4
Off	sucrose	S2	48	1.4
Off	yeast	S2	82	6.2
Off	sucrose	S2	58	2.4
Off	yeast	S2	43	4.2
Off	sucrose	S2	24	1.8
Off	yeast	S2	23	5
Off	sucrose	S2	29	2.2
Off	yeast	S2	26	2.6
Off	sucrose	S2	23	2
Off	yeast	S20	56	5.5
Off	sucrose	S20	79	3
Off	yeast	S20	37	4.2
Off	sucrose	S20	12	5.1
Off	yeast	S20	82	2.1
Off	sucrose	S20	61	3.8
Off	yeast	S20	12	6.3
Off	sucrose	S20	5	1.2
Off	yeast	S20	27	0.6
Off	sucrose	S20	28	2.7

## Sheet: Fig5E
Treatment	Well	FoodChoice	Events	MedDuration
on	sucrose	S2	13	2.4
on	sucrose	S2	19	2.2
on	sucrose	S2	83	1
on	sucrose	S2	44	0.8
on	sucrose	S2	61	1
on	sucrose	S2	71	0.8
on	sucrose	S2	44	0.4
on	sucrose	S2	79	1.2
on	sucrose	S2	66	0.9
off	sucrose	S2	28	2.5
off	sucrose	S2	32	3.8
off	sucrose	S2	20	3.8
off	sucrose	S2	81	0.8
off	sucrose	S2	20	1.3
off	sucrose	S2	51	1.4
off	sucrose	S2	28	1.5
off	sucrose	S2	8	1.1
on	sucrose	S20	29	2.4
on	sucrose	S20	95	1.6
on	sucrose	S20	115	1.6
on	sucrose	S20	72	2.2
on	sucrose	S20	115	2.4
on	sucrose	S20	87	2.2
on	sucrose	S20	15	2.4
on	sucrose	S20	48	4
on	sucrose	S20	10	2.1
on	sucrose	S20	48	1.6
off	sucrose	S20	19	4.2
off	sucrose	S20	92	2.8
off	sucrose	S20	37	4.6
off	sucrose	S20	14	4.6
off	sucrose	S20	35	4.6
off	sucrose	S20	5	2.2
off	sucrose	S20	51	3.2
off	sucrose	S20	14	4.8
on	sucrose	S2	35	1
on	sucrose	S2	43	1.2
on	sucrose	S2	57	1
on	sucrose	S2	29	2.6
on	sucrose	S2	40	1.2
on	sucrose	S2	31	1.4
on	sucrose	S20	96	2.2
on	sucrose	S20	59	0.8
on	sucrose	S20	164	2.2
on	sucrose	S20	134	2.4
on	sucrose	S2	53	1.6
on	sucrose	S2	65	0.8
on	sucrose	S2	64	0.6
on	sucrose	S2	18	0.8
on	sucrose	S20	33	1
on	sucrose	S20	18	0.8
on	sucrose	S20	82	1.4
on	sucrose	S20	133	2.2
on	sucrose	S20	33	2.6
off	sucrose	S2	104	2.8
off	sucrose	S2	28	2.6
off	sucrose	S2	9	2.8
off	sucrose	S2	59	3.8
off	sucrose	S20	43	8.6
off	sucrose	S20	238	2.4
off	sucrose	S20	43	3.6
off	sucrose	S20	24	6.3
off	sucrose	S20	32	4.7
off	sucrose	S2	11	1.2
off	sucrose	S2	4	2
off	sucrose	S2	21	3.2
off	sucrose	S2	5	1.6
off	sucrose	S20	30	5.5
off	sucrose	S20	40	6.2
off	sucrose	S20	36	7.4
off	sucrose	S20	31	5
on	yeast	S2	50	8.8
on	yeast	S2	7	10.4
on	yeast	S2	37	0.8
on	yeast	S20	45	1.2
on	yeast	S20	122	1
on	yeast	S20	57	0.8
on	yeast	S20	74	0.8
on	yeast	S20	72	0.8
on	yeast	S20	49	0.8
on	yeast	S2	37	2.4
on	yeast	S2	89	1.8
on	yeast	S2	150	4.2
on	yeast	S2	50	1.3
on	yeast	S2	137	1.4
on	yeast	S2	156	2.3
on	yeast	S20	28	5
on	yeast	S20	58	1.3
on	yeast	S20	33	2.6
on	yeast	S20	34	1.3
off	yeast	S2	47	7.2
off	yeast	S2	28	6
off	yeast	S2	14	2.6
off	yeast	S20	33	3.6
off	yeast	S20	114	1.5
off	yeast	S20	59	3
off	yeast	S20	35	3.2
off	yeast	S20	23	2
off	yeast	S2	100	1.4
off	yeast	S2	27	3.4
off	yeast	S2	81	3.6
off	yeast	S2	77	2.2
off	yeast	S2	48	2.4
off	yeast	S20	12	1.7
off	yeast	S20	55	1.6
off	yeast	S20	27	1.4
on	yeast	S2	66	2.4
on	yeast	S2	13	0.8
on	yeast	S2	22	0.9
on	yeast	S2	40	0.6
on	yeast	S2	41	3.4
on	yeast	S2	54	3.3
on	yeast	S20	98	2.9
on	yeast	S20	50	1
on	yeast	S20	88	1.3
on	yeast	S20	49	1.4
on	yeast	S2	50	2.4
on	yeast	S2	196	2.1
on	yeast	S2	104	1.4
on	yeast	S2	54	4.4
on	yeast	S20	45	0.8
on	yeast	S20	29	1.8
on	yeast	S20	99	1.4
on	yeast	S20	63	1.6
on	yeast	S20	52	1.4
off	yeast	S2	81	1.6
off	yeast	S2	48	2.2
off	yeast	S2	51	6.2
off	yeast	S2	89	1.6
off	yeast	S20	78	3.2
off	yeast	S20	139	1.2
off	yeast	S20	73	4.2
off	yeast	S20	46	1.6
off	yeast	S20	51	2.4
off	yeast	S2	26	12.1
off	yeast	S2	35	9.2
off	yeast	S2	69	4.8
off	yeast	S2	30	9.5
off	yeast	S20	81	3
off	yeast	S20	60	4.2
off	yeast	S20	59	2.8
off	yeast	S20	51	2.4

## Sheet: Fig5F
Lights	Well	FoodChoice	Events	MedDuration
off	sucrose	S2	47	2
off	sucrose	S2	18	2.4
off	sucrose	S2	13	2
off	sucrose	S2	80	2.5
off	sucrose	S2	17	2.8
off	sucrose	S2	36	2.1
off	sucrose	S2	49	1.8
off	sucrose	S2	89	1.6
off	sucrose	S2	66	2.4
off	sucrose	S2	31	1.8
on	sucrose	S2	18	0.8
on	sucrose	S2	4	1.5
on	sucrose	S2	1	0.2
on	sucrose	S2	3	0.8
on	sucrose	S2	19	0.4
on	sucrose	S2	19	1
on	sucrose	S2	72	1.7
on	sucrose	S2	13	1
on	sucrose	S2	35	1.6
on	sucrose	S2	71	1.6
off	sucrose	S20	103	2.8
off	sucrose	S20	113	4.2
off	sucrose	S20	38	2.8
off	sucrose	S20	30	4.4
off	sucrose	S20	29	3.8
off	sucrose	S20	16	3.1
on	sucrose	S20	36	1.9
on	sucrose	S20	75	1.2
on	sucrose	S20	97	1.2
on	sucrose	S20	51	1.4
on	sucrose	S20	36	1.6
on	sucrose	S20	12	0.9
on	sucrose	S20	18	0.6
on	sucrose	S20	17	1.4
on	sucrose	S20	4	2.6
on	sucrose	S20	8	1.2
off	yeast	S2	55	1
off	yeast	S2	20	2
off	yeast	S2	16	2.8
off	yeast	S2	51	3.2
off	yeast	S2	20	3.8
off	yeast	S20	112	1.2
off	yeast	S20	121	2.4
off	yeast	S20	35	1.8
off	yeast	S20	42	1.7
off	yeast	S20	24	1.2
off	yeast	S20	19	2
off	yeast	S2	33	2
off	yeast	S2	41	1.6
off	yeast	S2	75	1.8
off	yeast	S2	63	1
off	yeast	S2	26	1
on	yeast	S2	29	2.6
on	yeast	S2	34	3.9
on	yeast	S2	32	4.9
on	yeast	S2	19	3.2
on	yeast	S2	39	2.4
on	yeast	S20	83	2.6
on	yeast	S20	116	1.4
on	yeast	S20	79	1.2
on	yeast	S20	30	3.6
on	yeast	S20	34	1.6
on	yeast	S20	62	1.6
on	yeast	S20	45	1.4
on	yeast	S20	79	1.2
on	yeast	S20	46	2
on	yeast	S20	38	1
on	yeast	S2	60	3.4
on	yeast	S2	11	3.6
on	yeast	S2	14	1.6
on	yeast	S2	52	5.3
on	yeast	S2	28	2.6
off	sucrose	S2	60	2.1
off	sucrose	S2	42	1.3
off	sucrose	S2	57	1.2
off	sucrose	S2	51	2.6
off	sucrose	S2	34	1.6
off	sucrose	S2	19	2
off	sucrose	S2	71	1.8
off	sucrose	S2	58	2.4
off	sucrose	S2	55	1.6
on	sucrose	S2	39	0.8
on	sucrose	S2	32	0.6
on	sucrose	S2	18	0.7
on	sucrose	S2	18	1.4
on	sucrose	S2	26	1.7
on	sucrose	S2	30	1.6
on	sucrose	S2	36	1.1
on	sucrose	S2	137	1.2
on	sucrose	S2	20	0.9
on	sucrose	S2	8	1.4
off	sucrose	S20	59	2.4
off	sucrose	S20	20	3.2
off	sucrose	S20	114	4
off	sucrose	S20	28	4.1
off	sucrose	S20	81	2.8
off	sucrose	S20	20	2.7
off	sucrose	S20	47	3.2
off	sucrose	S20	108	2
off	sucrose	S20	37	4.8
off	sucrose	S20	47	3.6
off	sucrose	S20	12	3.5
on	sucrose	S20	25	3
on	sucrose	S20	11	2
on	sucrose	S20	68	1.9
on	sucrose	S20	29	1.8
on	sucrose	S20	93	0.8
on	sucrose	S20	6	1.3
on	sucrose	S20	64	1
on	sucrose	S20	10	1.5
on	sucrose	S20	30	1.6
off	yeast	S2	78	3.1
off	yeast	S2	37	1
off	yeast	S2	76	1.5
off	yeast	S20	45	1.2
off	yeast	S20	30	1.7
off	yeast	S20	139	1.8
off	yeast	S20	45	5
off	yeast	S20	82	0.8
off	yeast	S20	35	2.4
off	yeast	S20	56	2.4
off	yeast	S20	101	1
off	yeast	S20	28	1.9
off	yeast	S20	55	5.4
off	yeast	S20	8	2.9
off	yeast	S2	24	0.7
off	yeast	S2	68	1.9
off	yeast	S2	27	6.4
off	yeast	S2	65	2.6
off	yeast	S2	19	1.2
off	yeast	S2	49	1
on	yeast	S2	92	1.4
on	yeast	S2	115	2.4
on	yeast	S2	66	0.8
on	yeast	S2	20	3.4
on	yeast	S20	15	1.6
on	yeast	S20	7	1.8
on	yeast	S20	100	1
on	yeast	S20	41	0.6
on	yeast	S20	99	0.6
on	yeast	S20	7	0.8
on	yeast	S20	100	1.2
on	yeast	S20	46	1
on	yeast	S20	62	1.7
on	yeast	S2	16	3.2
on	yeast	S2	30	1.8
on	yeast	S2	14	0.8
on	yeast	S2	112	1
on	yeast	S2	98	1.8
on	yeast	S2	16	1.6

## Sheet: Fig5G and Fig5 - Fig Supp. 1
Lights	Well	FoodChoice	Events	MedDuration
off	sucrose	S2	10	4.2
off	sucrose	S2	2	3.9
off	sucrose	S2	16	4.4
off	sucrose	S2	6	3.7
off	sucrose	S2	16	2.8
off	sucrose	S2	19	2.2
off	sucrose	S2	14	2.2
off	sucrose	S2	36	3.3
off	sucrose	S2	17	4
off	sucrose	S2	16	2.6
on	sucrose	S2	4	2.7
on	sucrose	S2	9	3.2
on	sucrose	S2	11	3.4
on	sucrose	S2	3	1.8
on	sucrose	S2	6	3.1
on	sucrose	S2	6	2
on	sucrose	S2	3	0.8
on	sucrose	S2	10	3.7
on	sucrose	S2	59	1.4
on	sucrose	S2	11	2.4
on	sucrose	S2	10	0.9
on	sucrose	S2	6	2.5
off	sucrose	S20	31	4.8
off	sucrose	S20	119	4
off	sucrose	S20	103	3.8
off	sucrose	S20	88	7.8
off	sucrose	S20	5	3.8
off	sucrose	S20	23	5.2
off	sucrose	S20	52	4.5
off	sucrose	S20	12	6.8
off	sucrose	S20	25	4.2
off	sucrose	S20	24	6.5
on	sucrose	S20	10	5.1
on	sucrose	S20	16	9.7
on	sucrose	S20	16	3.9
on	sucrose	S20	11	7
on	sucrose	S20	20	7
on	sucrose	S20	27	3
on	sucrose	S20	16	6.3
on	sucrose	S20	17	5.4
on	sucrose	S20	9	4.4
on	sucrose	S20	15	6.8
on	sucrose	S20	7	1
off	yeast	S2	37	10.2
off	yeast	S2	27	5.4
off	yeast	S2	43	7.4
off	yeast	S2	51	7.6
off	yeast	S2	32	5.9
off	yeast	S2	35	4.2
off	yeast	S20	77	9.6
off	yeast	S20	101	2.6
off	yeast	S20	117	4.4
off	yeast	S20	83	5.2
off	yeast	S20	40	5
off	yeast	S2	35	5.6
off	yeast	S2	35	9.8
off	yeast	S2	52	7.6
off	yeast	S2	42	7.6
off	yeast	S20	59	8
off	yeast	S20	106	3
off	yeast	S20	68	6.2
off	yeast	S20	42	4.5
off	yeast	S20	35	7.2
on	yeast	S2	15	6.6
on	yeast	S2	40	10.9
on	yeast	S2	60	7.7
on	yeast	S2	36	5.4
on	yeast	S2	28	10
on	yeast	S2	20	7.2
on	yeast	S20	53	3.8
on	yeast	S20	91	6.2
on	yeast	S20	38	8
on	yeast	S20	110	6.9
on	yeast	S20	77	7
on	yeast	S2	20	7.4
on	yeast	S2	23	7.4
on	yeast	S2	41	4.2
on	yeast	S2	17	9.4
on	yeast	S2	24	5.6
on	yeast	S2	19	5.2
on	yeast	S20	22	5.9
on	yeast	S20	23	9
on	yeast	S20	77	8
on	yeast	S20	22	6.9
on	yeast	S20	42	6.5
on	yeast	S20	42	4.6
off	sucrose	S2	3	7.6
off	sucrose	S2	9	2.6
off	sucrose	S2	35	3
off	sucrose	S2	28	1.6
off	sucrose	S2	2	6.1
off	sucrose	S2	42	1.8
off	sucrose	S2	10	3.2
off	sucrose	S2	12	2.3
off	sucrose	S2	25	4
off	sucrose	S2	16	2.6
on	sucrose	S2	3	3.2
on	sucrose	S2	5	3
on	sucrose	S2	19	0.6
on	sucrose	S2	3	2.6
on	sucrose	S2	21	4.6
on	sucrose	S2	14	3.2
on	sucrose	S2	10	7.3
on	sucrose	S2	42	1
on	sucrose	S2	12	3.7
on	sucrose	S2	9	3.2
off	sucrose	S20	24	4.6
off	sucrose	S20	13	5.4
off	sucrose	S20	30	6.2
off	sucrose	S20	26	6.1
off	sucrose	S20	11	5.4
off	sucrose	S20	11	10.2
off	sucrose	S20	40	5.8
off	sucrose	S20	19	8.8
off	sucrose	S20	70	3.8
off	sucrose	S20	48	5.1
off	sucrose	S20	29	3.2
on	sucrose	S20	19	6
on	sucrose	S20	18	3.9
on	sucrose	S20	6	6
on	sucrose	S20	20	3.2
on	sucrose	S20	15	4.2
on	sucrose	S20	21	8.2
on	sucrose	S20	29	5
on	sucrose	S20	31	7.6
on	sucrose	S20	14	2
on	sucrose	S20	7	8.8
on	sucrose	S20	8	4.8
off	yeast	S2	22	12.1
off	yeast	S2	25	4.8
off	yeast	S2	80	7.4
off	yeast	S2	45	4.2
off	yeast	S2	27	11.8
off	yeast	S20	30	2.7
off	yeast	S20	30	9.1
off	yeast	S20	40	8.2
off	yeast	S20	44	3.8
off	yeast	S20	45	6.2
off	yeast	S2	55	4.6
off	yeast	S2	33	4
off	yeast	S2	31	8.2
off	yeast	S2	56	5.4
off	yeast	S2	43	4.2
off	yeast	S20	29	7.6
off	yeast	S20	52	3.4
off	yeast	S20	82	9.8
off	yeast	S20	97	4.4
off	yeast	S20	44	4.8
off	yeast	S20	48	3.2
on	yeast	S2	24	5.7
on	yeast	S2	32	4.8
on	yeast	S2	35	3.6
on	yeast	S2	24	4.4
on	yeast	S20	62	5.8
on	yeast	S20	63	6.8
on	yeast	S20	95	6.8
on	yeast	S20	38	2.1
on	yeast	S20	59	6
on	yeast	S2	25	6.8
on	yeast	S2	35	7.6
on	yeast	S2	32	7.7
on	yeast	S2	66	3.6
on	yeast	S2	16	2.5
on	yeast	S2	26	9.1
on	yeast	S20	26	2.4
on	yeast	S20	55	8
on	yeast	S20	40	8.2
on	yeast	S20	41	5.2
on	yeast	S20	8	10.2
on	yeast	S20	20	5.1

## Sheet: Fig5 - Fig Supp. 1A
Lights	Well	FoodChoice	Events	MedDuration
On	sucrose	S2	17	1.4
On	yeast	S2	36	4.8
On	sucrose	S2	42	2.7
On	yeast	S2	29	2.4
On	sucrose	S2	14	4.7
On	yeast	S2	15	5.6
On	sucrose	S2	31	2.8
On	yeast	S2	30	7.4
On	sucrose	S2	9	4.8
On	yeast	S2	31	5
On	sucrose	S20	13	9
On	yeast	S20	45	5.4
On	sucrose	S20	17	3.8
On	yeast	S20	47	6.2
On	sucrose	S20	33	3.8
On	yeast	S20	54	1.2
On	sucrose	S20	31	3.4
On	yeast	S20	36	2.2
On	sucrose	S20	51	2
On	yeast	S20	35	2
On	sucrose	S20	14	2
On	yeast	S20	17	1
On	yeast	S2	103	7.2
On	sucrose	S2	5	4.4
On	yeast	S2	80	5.8
On	sucrose	S2	19	2.6
On	yeast	S2	25	12
On	sucrose	S2	7	3.2
On	yeast	S2	20	9.7
On	sucrose	S2	2	4.1
On	yeast	S2	50	6.2
On	sucrose	S2	12	1.6
On	yeast	S2	11	2.6
On	sucrose	S2	8	0.4
On	yeast	S20	27	3
On	sucrose	S20	16	2.2
On	yeast	S20	46	2.4
On	sucrose	S20	29	4.4
On	yeast	S20	31	7.2
On	sucrose	S20	8	3
On	yeast	S20	43	2.4
On	sucrose	S20	30	4.4
On	yeast	S20	17	5.8
On	sucrose	S20	4	6.7
On	yeast	S20	3	13
On	sucrose	S20	6	3.3
Off	sucrose	S2	30	1.6
Off	yeast	S2	48	3.6
Off	sucrose	S2	4	2.5
Off	yeast	S2	30	7.5
Off	sucrose	S2	1	3
Off	yeast	S2	19	4.4
Off	sucrose	S2	2	2.9
Off	yeast	S2	41	7.2
Off	sucrose	S2	7	3
Off	yeast	S2	30	5.4
Off	sucrose	S20	14	9.8
Off	yeast	S20	35	5.2
Off	sucrose	S20	4	4.4
Off	yeast	S20	12	2.4
Off	sucrose	S20	15	3.6
Off	yeast	S20	45	7
Off	sucrose	S20	8	4.7
Off	yeast	S20	64	6
Off	sucrose	S20	19	5.6
Off	yeast	S20	44	7.1
Off	sucrose	S20	20	4.6
Off	yeast	S20	40	8.1
Off	yeast	S2	44	6.6
Off	sucrose	S2	13	2.8
Off	yeast	S2	65	8.2
Off	sucrose	S2	32	3
Off	yeast	S2	26	7.2
Off	sucrose	S2	5	2.4
Off	yeast	S2	43	8.2
Off	sucrose	S2	20	3.3
Off	yeast	S2	29	8
Off	sucrose	S2	2	1.5
Off	yeast	S20	59	7.6
Off	sucrose	S20	14	7
Off	yeast	S20	68	3.5
Off	sucrose	S20	32	3
Off	yeast	S20	60	7.7
Off	sucrose	S20	11	8.4
Off	yeast	S20	49	5.6
Off	sucrose	S20	23	4.2
Off	yeast	S20	17	3
Off	sucrose	S20	5	4.8
Off	yeast	S20	37	3.2
Off	sucrose	S20	4	4.3
On	sucrose	S2	2	4.7
On	yeast	S2	100	3.9
On	sucrose	S2	9	0.6
On	yeast	S2	26	5.5
On	sucrose	S2	6	1.7
On	yeast	S2	35	5.4
On	sucrose	S2	13	4.2
On	yeast	S2	20	8.7
On	sucrose	S2	23	5.4
On	yeast	S2	76	6.4
On	sucrose	S20	26	3.5
On	yeast	S20	9	1.8
On	sucrose	S20	37	1
On	yeast	S20	31	0.8
On	sucrose	S20	45	2
On	yeast	S20	34	0.4
On	sucrose	S20	15	5.6
On	yeast	S20	14	2.2
On	sucrose	S20	57	1.6
On	yeast	S20	26	0.4
On	sucrose	S20	30	5.4
On	yeast	S20	115	5.4
On	yeast	S2	34	4.4
On	sucrose	S2	12	1
On	yeast	S2	109	12
On	sucrose	S2	7	0.4
On	yeast	S2	32	8.2
On	sucrose	S2	3	1.4
On	yeast	S2	66	3.5
On	sucrose	S2	9	1.4
On	yeast	S2	31	7.6
On	sucrose	S2	2	0.5
On	yeast	S2	29	9
On	sucrose	S2	5	0.6
On	yeast	S20	46	8.6
On	sucrose	S20	38	5
On	yeast	S20	20	1.8
On	sucrose	S20	11	3.8
On	yeast	S20	46	2.9
On	sucrose	S20	35	3.8
On	yeast	S20	32	7.3
On	sucrose	S20	24	3.9
Off	sucrose	S2	8	2.3
Off	yeast	S2	50	10.1
Off	sucrose	S2	37	1.2
Off	yeast	S2	41	4
Off	sucrose	S2	37	0.6
Off	yeast	S2	43	4.6
Off	sucrose	S2	6	1.3
Off	yeast	S2	40	4.8
Off	sucrose	S2	3	1.4
Off	yeast	S2	36	4.7
Off	sucrose	S20	8	5.7
Off	yeast	S20	32	3.6
Off	sucrose	S20	10	3.3
Off	yeast	S20	42	4.7
Off	sucrose	S20	20	6.6
Off	yeast	S20	84	5.9
Off	sucrose	S20	22	5.3
Off	yeast	S20	56	4.1
Off	sucrose	S20	35	6
Off	yeast	S20	81	5.2
Off	yeast	S2	41	5.8
Off	sucrose	S2	9	2.6
Off	yeast	S2	28	10.8
Off	sucrose	S2	3	4.4
Off	yeast	S2	55	7
Off	sucrose	S2	9	1.2
Off	yeast	S2	55	3.8
Off	sucrose	S2	21	1
Off	yeast	S2	34	6.2
Off	sucrose	S2	2	3.8
Off	yeast	S20	60	3.9
Off	sucrose	S20	21	7
Off	yeast	S20	57	5.6
Off	sucrose	S20	10	3.9
Off	yeast	S20	21	6
Off	sucrose	S20	3	7.6
Off	yeast	S20	58	6.3
Off	sucrose	S20	12	4.4
Off	yeast	S20	46	4.6
Off	sucrose	S20	9	9.8

## Sheet: Fig5 - Fig Supp. 1B
Treatment	Well	FoodChoice	Events	MedDuration
Off	sucrose	S2	9	4.2
Off	yeast	S2	39	8.8
Off	sucrose	S2	3	5.6
Off	yeast	S2	33	10
Off	sucrose	S2	3	3.8
Off	yeast	S2	51	8.4
Off	sucrose	S2	3	3
Off	yeast	S2	27	14.4
Off	sucrose	S2	1	5.6
Off	yeast	S2	29	9.2
Off	sucrose	S20	19	7.8
Off	yeast	S20	90	4.4
Off	sucrose	S20	31	5.4
Off	yeast	S20	80	6.5
Off	sucrose	S20	6	5.5
Off	yeast	S20	13	5
Off	sucrose	S20	3	7
Off	yeast	S20	36	4.4
Off	sucrose	S20	54	4.4
Off	yeast	S20	54	3
Off	sucrose	S20	25	3.6
Off	yeast	S20	47	3.8
Off	yeast	S2	41	4.4
Off	sucrose	S2	3	2.6
Off	yeast	S2	28	9.2
Off	sucrose	S2	7	2.4
Off	yeast	S2	47	8.6
Off	sucrose	S2	8	4.6
Off	yeast	S2	58	6.7
Off	sucrose	S2	18	2.7
Off	yeast	S2	44	6.6
Off	sucrose	S2	8	2.4
Off	yeast	S2	39	5
Off	sucrose	S2	23	1.2
Off	yeast	S20	58	9.1
Off	sucrose	S20	16	5.3
Off	yeast	S20	50	6
Off	sucrose	S20	4	5.7
Off	yeast	S20	62	8.3
Off	sucrose	S20	5	7
Off	yeast	S20	69	4.8
Off	sucrose	S20	4	11
Off	yeast	S20	20	10.3
Off	sucrose	S20	7	5.8
Off	yeast	S20	39	5
Off	sucrose	S20	15	4.4
On	sucrose	S2	3	1.4
On	yeast	S2	72	3.5
On	sucrose	S2	9	2.8
On	yeast	S2	29	5
On	sucrose	S2	8	1.4
On	yeast	S2	66	4.3
On	sucrose	S2	22	6.8
On	yeast	S2	17	4.2
On	sucrose	S2	3	1.6
On	yeast	S2	13	14.4
On	sucrose	S20	11	6.2
On	yeast	S20	3	2.4
On	sucrose	S20	3	4.2
On	yeast	S20	121	6.6
On	sucrose	S20	1	3.4
On	yeast	S20	14	3.7
On	sucrose	S20	12	8.7
On	yeast	S20	14	5.1
On	sucrose	S20	12	11.6
On	yeast	S20	5	1.4
On	sucrose	S20	10	11.3
On	yeast	S20	15	0.8
On	yeast	S2	22	3.7
On	sucrose	S2	11	1.6
On	yeast	S2	66	7.9
On	sucrose	S2	1	5.2
On	yeast	S2	35	4.8
On	sucrose	S2	14	2.6
On	yeast	S2	16	9.6
On	sucrose	S2	2	7.7
On	yeast	S20	12	3.5
On	sucrose	S20	10	2.8
On	yeast	S20	77	3.4
On	sucrose	S20	10	4.6
On	yeast	S20	16	4.9
On	sucrose	S20	12	4.2
On	yeast	S20	38	5.9
On	sucrose	S20	15	5.4
On	sucrose	S2	2	4.7
On	yeast	S2	25	14
On	sucrose	S2	5	4
On	yeast	S2	17	10.4
On	sucrose	S2	17	0.8
On	yeast	S2	43	6.6
On	sucrose	S2	17	5.6
On	yeast	S2	14	7.3
On	sucrose	S2	3	1.4
On	yeast	S2	19	8.6
On	sucrose	S20	1	0.6
On	yeast	S20	5	3.2
On	sucrose	S20	20	8.4
On	yeast	S20	34	5.6
On	sucrose	S20	55	2.4
On	yeast	S20	34	1.4
On	sucrose	S20	7	4.4
On	yeast	S20	4	0.4
On	sucrose	S20	5	7.2
On	yeast	S20	48	4.2
On	sucrose	S20	8	3.4
On	yeast	S20	27	1.8
On	yeast	S2	18	5.7
On	sucrose	S2	5	0.6
On	yeast	S2	28	11.7
On	sucrose	S2	8	0.4
On	yeast	S2	48	6.4
On	sucrose	S2	3	2.2
On	yeast	S2	43	7.4
On	sucrose	S2	11	0.4
On	yeast	S2	35	8.2
On	sucrose	S2	17	1.8
On	yeast	S2	27	8
On	sucrose	S2	2	0.7
On	yeast	S20	15	8.8
On	sucrose	S20	2	7
On	yeast	S20	16	8.7
On	sucrose	S20	2	0.7
On	yeast	S20	21	7
On	sucrose	S20	16	2.3
On	yeast	S20	23	8.4
On	sucrose	S20	6	3.9
On	yeast	S20	15	6.2
On	sucrose	S20	4	10.3
Off	sucrose	S2	15	5.2
Off	yeast	S2	39	7.2
Off	sucrose	S2	32	3.4
Off	yeast	S2	43	5.8
Off	sucrose	S2	2	2.8
Off	yeast	S2	50	4.2
Off	sucrose	S2	5	9.8
Off	yeast	S2	33	5.4
Off	sucrose	S2	1	1
Off	yeast	S2	30	10
Off	sucrose	S20	3	5.8
Off	yeast	S20	42	5.7
Off	sucrose	S20	12	5.6
Off	yeast	S20	95	7.2
Off	sucrose	S20	16	4
Off	yeast	S20	42	4.8
Off	sucrose	S20	18	5.4
Off	yeast	S20	51	5.2
Off	sucrose	S20	17	6
Off	yeast	S20	70	6.5
Off	yeast	S2	50	6.4
Off	sucrose	S2	2	3.9
Off	yeast	S2	34	9.4
Off	sucrose	S2	2	7.6
Off	yeast	S2	41	7
Off	sucrose	S2	16	5.3
Off	yeast	S2	32	7.4
Off	sucrose	S2	4	2.3
Off	yeast	S2	15	11
Off	sucrose	S2	3	3.8
Off	yeast	S20	19	4.6
Off	sucrose	S20	17	4.2
Off	yeast	S20	277	0.4
Off	sucrose	S20	15	2.4
Off	yeast	S20	21	4.6
Off	sucrose	S20	6	9.3
